# Supplementary material for: Incidence, time and determinants of tuberculosis treatment default in Yaounde, Cameroon: a retrospective hospital register-based cohort study
Source: PubMed Central journal article supplement — BMJ Open. 2011 Nov 24;1(2):e000289. doi: 10.1136/bmjopen-2011-000289 (PMC3225586; doi:10.1136/bmjopen-2011-000289), 2011-11-24
Supplement: bmjopen-2011-000289.draft_revisions.pdf [file bmjopen-2011-000289.draft_revisions.pdf]

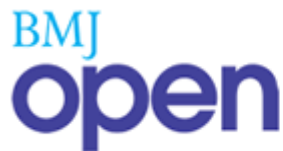

**Incidence, time and determinants of tuberculosis treatment default in Yaounde, Cameroon: a retrospective hospital register-based cohort study**

|                                 |                                                                                                                                                                                                                                                                                                                                                                                                                                                   |
|---------------------------------|---------------------------------------------------------------------------------------------------------------------------------------------------------------------------------------------------------------------------------------------------------------------------------------------------------------------------------------------------------------------------------------------------------------------------------------------------|
| Journal:                        | <i>BMJ Open</i>                                                                                                                                                                                                                                                                                                                                                                                                                                   |
| Manuscript ID:                  | bmjopen-2011-000289                                                                                                                                                                                                                                                                                                                                                                                                                               |
| Article Type:                   | Research                                                                                                                                                                                                                                                                                                                                                                                                                                          |
| Date Submitted by the Author:   | 05-Aug-2011                                                                                                                                                                                                                                                                                                                                                                                                                                       |
| Complete List of Authors:       | Pefura Yone, Eric; Yaounde Jamot's Hospital; Faculty of Medicine and Biomedical Sciences, The University of Yaounde I, Department of Internal Medicine and specialties<br>Kengne, Andre; South African Medical research Council & University of Cape Town<br>Kuaban, Christopher; Yaounde Jamot's Hospital, Chest Unit; Faculty of Medicine and Biomedical Sciences, The University of Yaounde I, Department of Internal Medicine and specialties |
| <b>Primary Subject Heading</b>: | Infectious diseases                                                                                                                                                                                                                                                                                                                                                                                                                               |
| Keywords:                       | Tuberculosis < INFECTIOUS DISEASES, PUBLIC HEALTH, Thoracic medicine < INTERNAL MEDICINE                                                                                                                                                                                                                                                                                                                                                          |
|                                 |                                                                                                                                                                                                                                                                                                                                                                                                                                                   |

SCHOLARONE™  
Manuscripts

only

1  
2  
3 **Incidence, time and determinants of tuberculosis treatment default in Yaounde,**  
4 **Cameroon: a retrospective hospital register-based cohort study**  
5  
6

7 Short title: **Tuberculosis treatment default**  
8

9 Eric Walter PEFURA YONE (1, 2), André Pascal KENGNE (3), Christopher KUABAN (1,  
10 2)  
11

12  
13  
14 1) Department of Internal Medicine and specialties, Faculty of Medicine and Biomedical  
15 Sciences, The University of Yaounde I, Cameroon  
16

17  
18 2) Chest unit, Yaounde Jamot's Hospital, Yaounde, Cameroon  
19

20  
21 3) South African Medical research Council & University of Cape Town, South Africa  
22  
23  
24  
25

26 **Correspondence to:**  
27

28 Dr Eric Walter PEFURA YONE,  
29

30 Hôpital Jamot de Yaoundé,  
31

32 PO Box 4021-Yaounde, Cameroon  
33

34 Tel: (237)96539726, Fax: (237)22203165,  
35

36 Email: pefura2002@yahoo.fr  
37  
38  
39  
40  
41

42 **Tables: 3**  
43

44 **Figures: 3**  
45

46 **Online only material: 2 tables**  
47

48 **Word count:** abstract-250; Main text (excluding tables, figures abstract & references)-2,658  
49

50 **References: 21**  
51  
52  
53  
54  
55  
56  
57  
58  
59  
60

## Abstract

Background and purpose: High rates of antituberculosis treatment (ATT) discontinuation have been reported in places in Africa. The aim of this study was to determine the rate, time to- and determinants of antituberculosis treatment default at the Yaounde Jamot's referral tuberculosis diagnosis and treatment centre.

Methods: All patients started on ATT at the centre between January and December 2009 were considered for inclusion on a retrospective basis. Tuberculosis treatment default or ATT discontinuation was defined as any interruption of treatment for at least 2 months, following treatment initiation. Sociodemographic and clinical predictors of treatment discontinuation were investigated with the use of logistic and Cox regressions models.

Results: Of the 1581 tuberculosis patients with treatment outcome known, 335 (21.2%) defaulted from treatment, 86 (5.4%) died and treatment failed in 6 (0.4%). Therefore, treatment was successfully completed in 1154 (73%) patients. Median duration to treatment discontinuation was 90 days (interquartile range: 30-150), and 62% of treatment discontinuation occurred during continuation phase. Treatment on the outpatient basis during intensive phase [odd ratio 1.44 (95% confidence interval: 1.08-1.91)] and non-consenting for HIV screening [1.84 (1.29-2.61)] were the main determinants of defaulting from treatment in multivariable analysis.

Conclusions – The default incidence rate is relatively high in this centre and treatment discontinuation occurs frequently during the continuation phase of the treatment. Actions are needed to improve adherence to treatment when taken on an ambulatory basis, clarify the association between HIV testing and defaulting to ATT, and identify other potential determinants of treatment discontinuation in this setting.

Word count – 250

Key words – tuberculosis, default, antituberculosis, treatment discontinuation, Cameroon

1  
2  
3 **Article focus:** What are the rates, time to- and determinants of antituberculosis treatment  
4  
5 (ATT) discontinuation in the era of directly observed treatment in sub-Saharan Africa, using  
6  
7 the case of Cameroon for illustration?  
8  
9

10  
11 **Key messages:** ATT success rates remain non-optimal in sub-Saharan Africa where the  
12  
13 highest global incidence rates for tuberculosis are found. Treatment discontinuation is one of  
14  
15 the main reasons, but has been less explored in Africa in recent times.  
16  
17

18  
19 Knowledge of determinants of ATT discontinuation is critical for informing health service  
20  
21 and policy solutions needed to improve the outcome of care for tuberculosis and contain the  
22  
23 spread of the disease.  
24  
25

26  
27 **Strengths:** Large cohort study with up to 1688 participants  
28  
29

30 **Limitations:** retrospective study with lack of some information  
31  
32  
33  
34  
35  
36  
37  
38  
39  
40  
41  
42  
43  
44  
45  
46  
47  
48  
49  
50  
51  
52  
53  
54  
55  
56  
57  
58  
59  
60

## INTRODUCTION

Tuberculosis is highly endemic in the majority of sub-Saharan African (SSA) countries where highest global annual incidence rates are recorded.[1] The expected therapeutic success target of 85% among newly diagnosed individuals with positive smear is largely unachieved in many settings in SSA.[1] Defaulting from tuberculous treatment is one of the reasons for this non-optimal performance. Tuberculosis treatment default or antituberculosis treatment (ATT) discontinuation is defined as any interruption of ATT for at least 2 months, following treatment initiation.[2,3] Non-adherence to ATT is associated with disease reoccurrence following treatment, increased mortality, maintenance of micro-organisms reservoirs and emergence drug-resistant species of mycobacterium.[4]

The directly observed treatment (DOT) strategy has been recommended by the World Health Organisation (WHO),[5] for improving the outcome of care for tuberculosis. Implementation of the DOT strategy started in Cameroon in the mid 90's and was expanded to the entire country in the years 2000. Despite this, available evidence suggests that ATT discontinuation has remained relatively high.[6] Many factors have been linked with ATT discontinuation in SSA including infrequent bacilloscopic monitoring, transfer of patients across health services units, lack of family support and side effects of medications.[7] In general, studies on the determinants of ATT discontinuation in Africa are mostly out-dated and less reflective of the DOT era, and the few relevant studies are either inconsistent or too heterogeneous to provide reliable conclusions that can inform health service and policy solutions.[7] In addition, none of the relevant study has been conducted in Cameroon.

The aim of the current study was to assess the incidence rate, determinants and time to ATT discontinuation in the real-life settings of a historical diagnosis and treatment centre for tuberculosis in Yaounde, Cameroon.

## METHODS

### Study setting

The study was conducted in the pneumology service of Yaounde Jamot Hospital (YJH). The YJH serves a referral centre for tuberculosis and respiratory diseases for the capital city of Cameroon (Yaounde) and surrounding areas. It is one of the major centres for diagnosis and treatment of tuberculosis (CDT) in Cameroon. The pneumology service of YJH is a 257

1  
2  
3 bedded service and 11% of all cases of tuberculosis diagnosed in Cameroon in 2009 were  
4 managed in this service. Since five years, about 1600 to 1800 patients with tuberculosis are  
5 diagnosed and treated by the CDT. The YJH also hosts an approved treatment centre (ATC)  
6 that provides care to people living with Human Immunodeficiency Virus (HIV) infection.  
7 Patients received at the CDT during January to December 2009 were considered for inclusion  
8 in the study. The study was approved by the administrative authorities of the YJH.  
9

### 14 **Definition and classification of tuberculosis cases**

16 Patients who receive care at the CDT of YJH are consecutively registered as they are started  
17 on treatment. For patients with a past exposure to ATT, the approach is nearly similar. Those  
18 patients who report back to the centre with active tuberculosis and who have been treated in  
19 the past for at least one month are registered again with a new number and started on a  
20 standardised re-treatment regimen. The following international definitions are applied: [2, 3,  
21 5] 1) smear-positive pulmonary tuberculosis (SPTB+) - acid-fast bacillary (AFB) found in at  
22 least two sputum specimens; 2) smear-negative pulmonary tuberculosis (SPTB-) – persisting  
23 negativity on three sputum examinations after ten-day course of non-specific antibiotic  
24 treatment in a patient with tuberculosis-like clinical and radiological signs, and in the absence  
25 of any obvious cause; 3) extra-pulmonary tuberculosis – tuberculosis involving organs other  
26 than the lungs. Patients with past exposure to ATT are usually all smear-positive and are  
27 further classified as “relapse” (i.e. reoccurrence of the disease following a successful ATT  
28 course), “failure” (i.e. positive smear after five months of ATT) and “treatment after default”  
29 (i.e. starting ATT again after two consecutive months of interruption). A “new case” is a  
30 patient with tuberculosis who has never been exposed to ATT for more than one month in the  
31 past. “Other cases of tuberculosis” referred to patients who cannot fit in one of the categories  
32 described above.  
33  
34  
35  
36  
37  
38  
39  
40  
41  
42  
43  
44  
45  
46

### 47 **Detection and management of HIV infection**

49 At the CDT of the YJH, all patients with tuberculosis are screened for HIV infection free of  
50 charge after informed consent has been obtained from the patient or relative for dependant  
51 patients. This includes detection of anti-HIV 1 and anti-HIV 2 antibodies in the serum with  
52 the use of two rapid tests: Determine® HIV ½(Abbot laboratories, Tokyo, Japan) and  
53 Immunocomb® II HIV 1 and 2 Bispot (Organics, Courbevoie, France). A patient is classified  
54 as HIV positive when the two tests are positive. For discordant tests, a confirmatory western  
55 blot test (New Lav Blot, Sanofi diagnostics-Pasteur) is conducted. All HIV-positive patients  
56  
57  
58  
59  
60

1  
2  
3 are started on prophylaxis with cotrimoxazole and those with CD4 lymphocytes count  
4 <200/mm<sup>3</sup> (or <15% of the total lymphocyte count in those <15 years of age) are started on  
5 triple antiretroviral therapy free of charge. Initial antiretroviral regimens are the combinations  
6 lamivudine-zidovudine-efavirenz or lamivudine-stavudine-efavirenz.  
7  
8  
9

### 10 11 **Tuberculosis treatment**

12  
13 Tuberculosis treatment at the CDT is based on the DOT approach, in accordance with the  
14 guidelines of the Cameroon National Programme Against Tuberculosis (NPAT) and the WHO  
15 recommendations.[2, 3] Patients are either admitted during the intensive phase (IP) of ATT,  
16 or treated as outpatient. Antituberculosis drugs are dispensed free of charge to all patients.  
17 Treatment regimens used are standard regimens of category I for new patients and of category  
18 II for re-treatment cases. New cases are treated with a regimen that includes an intensive  
19 phase of two months duration with rifampicin (R), isoniazid (H), ethambutol (E) and  
20 pyrazinamide (Z), followed by a 4-month continuation phase with rifampicin and isoniazid.  
21 During re-treatment, category I medications (R, H, E, Z) are completed with streptomycin (S).  
22 Therefore, re-treatment cases are treated with RHEZS for two months, followed by one month  
23 on RHEZ and five months on RHE. During the intensive phase, adherence is directly  
24 monitored by the healthcare team for patients admitted, and during weekly drug collection in  
25 those treated as outpatients. The continuation phase is conducted on the outpatient basis and  
26 adherence assessed during monthly drugs collection visits.  
27  
28  
29  
30  
31  
32  
33  
34  
35  
36  
37

### 38 39 **Monitoring and outcomes of tuberculosis treatment**

40  
41 During ATT, SPTB+ patients are re-examined for AFB at the end of month 2, 5 and 6 for new  
42 cases, and at the end of month 3, 5 and 8 in case of re-treatment. SPTB- and patients with  
43 extra-pulmonary tuberculosis are monitored clinically and/or radiologically at the same  
44 frequency. At the end of the treatment, patients are ranked into mutually exclusive categories  
45 as:[2] 1) cured – patient with negative smear at the last month of treatment and at least one of  
46 the preceding; 2) treatment completed – patient who has completed the treatment and for  
47 whom the smear result at the end of the last month is not available; 3) failure – patient with at  
48 least two positive smear at the 5<sup>th</sup> month or later during treatment; 4) death – death from any  
49 cause during treatment; 5) defaulter – patient who's treatment has been interrupted for at least  
50 two consecutive months; 6) transfer – patient transferred to complete his treatment in another  
51 centre and who's treatment outcome is unknown.  
52  
53  
54  
55  
56  
57  
58  
59  
60

## Data collection

Tuberculosis treatment registers and ATT treatment forms of the YJH's CDT served as basis for data collection for the study. Data were collected on age, sex, residence (urban vs. rural), history of exposure to ATT, localisation of tuberculosis infection, status for HIV infection, CD4 lymphocyte count (in those with HIV infection), intensive ATT setting (hospital vs. ambulatory), outcome of ATT and time to treatment discontinuation. Cured and ATT completion were considered as favourable outcome (successful treatment) while death, default and failure were considered as unfavourable outcome.[8] Patients who died or were transferred during treatment were included only in time-to-event analysis.

## Statistical methods

Data analysis used SPSS® v.12.0.1 for Windows® (SPSS Inc., Chicago, USA) and SAS/STAT® v 9.1 for windows (SAS Institute Inc., Cary, NC, USA). Results are presented as count (proportions), means (standard deviation, SD) or median (interquartile range, IQR). Group comparisons used chi square of Fisher exact test for qualitative variables, and Student t-test or Mann-Whitney U test for quantitative variables. Logistic regression models were used to investigate potential determinants of ATT discontinuation before and after adjustment for confounders. To assess potential influence of those patients excluded as well as time to treatment discontinuation on effect estimates, secondary analyses were conducted with the used of survival methods. In this approaches, Cox proportional hazard regression models were used to relate baseline characteristics with treatment discontinuation during follow-up. Exploratory analyses were adjusted for age and sex; then all significant predictors identified were entered into the same multivariable model adjusted for sex and age. All Cox models were stratified by type of patients (i.e. new patient, retreatment) to account for differences in the duration of treatment. Kaplan-Meier estimator was also used to depict the probability of treatment discontinuation across strata of significant predictors and group comparisons made with the use of the log-rank test. A p-value<0.05 was used to characterise statistically significant results.

## RESULTS

### Study population and ATT discontinuation rate

During the study period, 1688 patients with tuberculosis were registered at the CDT. Their



demographic and clinical profile, and outcomes are summarised in Table 1. Of these participants, 199 (11.8%) were excluded from the main analysis for transferred or discharged against medical advice during treatment (104 patients), treatment failure (6 patients), deaths (86) and other forms of tuberculosis (3 patients). Of the 1489 eligible patients included in the final analysis, 1154 had successful ATT and 335 (21.2%) were lost to follow-up (Figure 1).

**Table 1: Demographic, clinical characteristics and outcomes of patients with tuberculosis at the Yaounde Jamot Hospital in 2009**

| Characteristics            | Sub-category                | n=1688 (%)       |
|----------------------------|-----------------------------|------------------|
| <b>Age, years</b>          | <15                         | 38 (2.3)         |
|                            | 15-59                       | 1556 (92.1)      |
|                            | > 60                        | 94 (5.6)         |
|                            | Median (IQR)                | 32 (25-42)       |
| <b>Sex</b>                 | Men                         | 954 (56.5)       |
|                            | Women                       | 734 (43.5)       |
| <b>Residence</b>           | Urban                       | 1423/1662 (85.6) |
|                            | Rural                       | 239/1662 (14.6)  |
| <b>Place of screening</b>  | This centre                 | 1626 (96.3)      |
|                            | Elsewhere                   | 62 (3.7)         |
| <b>Hospitalisation</b>     | Yes                         | 1098 (65)        |
|                            | No                          | 590 (35)         |
| <b>Clinical form of TB</b> | Smear positive pulmonary TB | 1231 (73)        |
|                            | Smear negative pulmonary TB | 168 (10)         |
|                            | Extra-pulmonary             | 289 (17)         |
| <b>Type of TB</b>          | New case                    | 1543 (91.4)      |
|                            | Re-treatment cases          | 142 (8.4)        |
|                            | Other cases                 | 3 (0.2)          |
| <b>HIV serology</b>        | Negative                    | 942 (55.8)       |
|                            | Positive                    | 505 (29.9)       |
|                            | Not done                    | 241 (14.3)       |
| <b>Outcome</b>             | Cure                        | 275 (16.3)       |
|                            | Treatment completed         | 880 (52.1)       |
|                            | Failure                     | 6 (0.4)          |
|                            | Death                       | 86 (5.1)         |
|                            | Transfer-out                | 104 (6.2)        |
|                            | Defaulter                   | 337 (20)         |

IQR, inter quartile range ; TB, tuberculosis ; HIV, Human Immunodeficiency Virus

1  
2  
3  
4  
5  
6  
7  
8  
9  
10  
11  
12  
13  
14  
15  
16  
17  
18  
19  
20  
21  
22  
23  
24  
25  
26  
27  
28  
29  
30  
31  
32  
33  
34  
35  
36  
37  
38  
39  
40  
41  
42  
43  
44  
45  
46  
47  
48  
49  
50  
51  
52  
53  
54  
55  
56  
57  
58  
59  
60

Of those included in the main analysis, 844 (56.7%) were women, and the median age (IQR) was 32 years (24-42). Fifty-seven (3.8%) had been referred from another CDT; 1099 (73.8%) had PTB+, 138 (9.3%) PTB- and 252 (16.9%) extra-pulmonary tuberculosis; 1358 (91.2%) were new cases, and HIV test was positive in 425 (32.8%) out of the 1296 patients in whom such test was performed.

### **Time to tuberculosis treatment discontinuation**

ATT interruption in 209 patients (62.4%) occurred during continuation phase of treatment (Figure 2) and the median (IQR) duration to ATT discontinuation was 90 days (30-150). ATT discontinuation was more likely to occur during continuation phase in those hospitalised during intensive phase than in those treated as outpatients [133 (74.7%) vs. 76 (48.8%),  $p < 0.0001$ ].

### **Determinants of treatment discontinuation**

In univariable analysis (Table 2), outpatient ATT (odds ratio: 1.78; 95% confidence interval: 1.38-2.29), SPTB- (1.68; 1.12-2.52) and non-availability of HIV test results (2.44; 1.71-3.46) were related to tuberculosis treatment default. In multivariable analysis (Table 3), outpatient ATT (1.44; 1.08-1.91) and non-availability of HIV test results (1.84; 1.29-2.61) were the main determinants of ATT discontinuation.

In secondary analysis, Cox regression models were used to examine predictors of treatment default using the observed follow-up duration for all participants in the overall cohort. The same predictors emerged in sex- and age adjusted models, multivariable model as determinants of treatment discontinuation, although there were differences in magnitudes of the effect size (Online appendix Table 1 and 2). The probability of treatment discontinuation according to setting for intensive treatment and whether HIV test was done is depicted in Figure 3.

**Table 2: Demographic and clinical characteristics of patients with tuberculosis according to the outcome of treatment (success vs. treatment default) (n=1489)**

| Characteristics                 | Categories      | Defaulter<br>n=335(%) | Success<br>n=1154 (%) | Crude odds ratio<br>(95% CI) | P       |
|---------------------------------|-----------------|-----------------------|-----------------------|------------------------------|---------|
| <b>Sex</b>                      | Men             | 195 (58.2)            | 649 (56.2)            | 1.08 (0.84-1.40)             | 0.522   |
|                                 | Women           | 140 (41.8)            | 505 (43.8)            |                              |         |
| <b>Age, years</b>               | ≤ 32            | 169 (50.4)            | 613 (53.1)            | 0.90 (0.70-1.15)             | 0.389   |
|                                 | > 32            | 166 (49.6)            | 541 (46.9)            |                              |         |
| <b>Residence</b>                | Urban           | 282/329 (85.7)        | 994/1138 (87.3)       | 0.87 (0.60-1.26)             | 0.439   |
|                                 | Rural           | 47/329 (14.3)         | 144/1138 (12.7)       |                              |         |
| <b>Place of Screening</b>       | This centre     | 318 (94.9)            | 1114 (96.5)           | 0.67 (0.36-1.25)             | 0.177   |
|                                 | Elsewhere       | 17 (5.1)              | 40 (3.5)              |                              |         |
| <b>Setting of intensive ATT</b> | Outpatient      | 157 (46.9)            | 383 (33.2)            | 1.78 (1.38-2.29)             | <0.0001 |
|                                 | Hospitalisation | 178 (53.1)            | 771 (66.8)            |                              |         |
| <b>Clinical form of TB</b>      | Positive smear  | 239 (71.3)            | 860 (74.5)            | Reference                    |         |
|                                 | Negative smear  | 44 (13.1)             | 94 (8.1)              | 1.68 (1.12-2.52)             | 0.008   |
|                                 | Extrapulmonary  | 52 (15.5)             | 200 (17.3)            | 0.94 (0.66-1.33)             | 0.699   |
| <b>Type of TB</b>               | New cases       | 299 (89.3)            | 1059 (91.8)           | 0.75 (0.49-1.14)             | 0.153   |
|                                 | Re-treatment    | 36 (10.7)             | 95 (8.2)              |                              |         |
| <b>HIV serology</b>             | Negative        | 168 (50.1)            | 703 (60.9)            | Reference                    |         |
|                                 | Positive        | 96 (28.7)             | 329 (28.5)            | 1.22 (0.91-1.64)             | 0.166   |
|                                 | Not done        | 71 (21.2)             | 122 (10.6)            | 2.44(1.71-3.46)              | <0.0001 |
| <b>Sputum Smear conversion*</b> | Yes             | 781/858 (91)          | 173/183 (94.5)        | 0.59 (0.28-1.20)             | 0.119   |
|                                 | No              | 77/858(9)             | 10(5.5)               |                              |         |

\* At the end of intensive phase (applicable only to patients with smear positive tuberculosis)

TB, tuberculosis; ATT, antituberculosis treatment; CI, confidence interval; HIV, Human Immunodeficiency Virus

**Table 3: Multivariable adjusted predictors of antituberculosis treatment default**

| Characteristics             | $\beta$ coefficient | Odds ratio | 95% CI    | P     |
|-----------------------------|---------------------|------------|-----------|-------|
| Outpatient intensive phase  | 0.37                | 1.44       | 1.68-1.91 | 0.012 |
| Screened elsewhere          | 0.095               | 1.10       | 0.60-2.01 | 0.757 |
| Smear negative pulmonary TB | -0.40               | 0.67       | 0.41-1.09 | 0.105 |
| Re-treatment cases          | 0.40                | 1.49       | 0.98-2.25 | 0.059 |
| Unknown status for HIV      | 0.61                | 1.84       | 1.29-2.61 | 0.001 |

TB, tuberculosis ; HIV, Human Immunodeficiency Virus ; CI, confidence interval

## DISCUSSION

In this study, we have assessed the incidence of ATT discontinuation and predictors of treatment drop-out in a large cohort of patients with tuberculosis treatment in a major referral centre in Cameroon. Treatment success rate was 73% and the cumulative incidence of Treatment discontinuation was 21.2% overall and 21.7% among patients with smear-positive pulmonary tuberculosis. Before the reorganisation of the fight against tuberculosis in Cameroon and roll out of the DOT strategy, ATT discontinuation was 10% higher among new patients with smear positive tuberculosis in the study centre.[9] The currently observed discontinuation rates are twice higher than the expected <10%, a requirement if the 85% ATT success rates prescribed in the millennium development goals are to be achieved.[10] ATT drop-out/discontinuation rate in sub-Saharan Africa ranges from 11.3 in Ethiopia to 29.8% in Zambia.[11,12] Treatment drop-out/discontinuation is a major challenge to programmes against tuberculosis, in the sense that non-adherence to ATT is associated with reoccurrence of the disease, preservation of reservoirs for micro-organism dissemination, emergence of drug resistant species of mycobacterium and increased tuberculosis related deaths.[14]

Two out of three patients who dropped-out in our study did so during the continuation phase of ATT. Predominantly late ATT discontinuation (i.e. after the intensive phase) has also been confirmed in a systematic review.[13] This late discontinuation could partly be explained by the improved condition of the patient following the intensive phase of ATT. It is possible that patients who feel clinically better following this phase are less motivated to continue the treatment as they don't feel the need to do so.[14]

1  
2  
3  
4  
5  
6  
7  
8  
9  
10  
11  
12  
13  
14  
15  
16  
17  
18  
19  
20  
21  
22  
23  
24  
25  
26  
27  
28  
29  
30  
31  
32  
33  
34  
35  
36  
37  
38  
39  
40  
41  
42  
43  
44  
45  
46  
47  
48  
49  
50  
51  
52  
53  
54  
55  
56  
57  
58  
59  
60

ATT on the outpatient basis during the intensive phase and unknown status for HIV were the main determinant of treatment discontinuation found in our study. This would tend to suggest that direct daily supervision reduces the risk of drop out. This could be explained at least in part by the fact that those who receive ATT as in-patient during intensive phase also receive more education on the disease, the duration and outcome of care and are therefore more motivated to observe the treatment for the required duration. Two studies from Ethiopia and Zambia have reported that poor knowledge of ATT duration among patients was associated with high risk of treatment discontinuation.[11,12] Unlike our results however, another study in Spain found no protective effect of DOT on ATT discontinuation.[15] Patients with unknown status for HIV in our study are more likely to be those who did not consent for the test, since cost is not a constraint for HIV screening in our setting. It is possible that faced with the persisting invitation from healthcare personnel to accept HIV screening, some of the non-consenting patient would prefer to stop the ATT and walk away from the programme. The stigmatisation of people living with HIV is a reason for not-consenting for screening.[16,17] We can also speculate that ATT discontinuation is not the direct consequence of not-consenting for HIV screening, but the latter is just an indicator of the patient subgroup that will adhere less to any medical prescription. The effects of non-consent for HIV screening on ATT discontinuation have not been confirmed by other studies.[7] In agreement with a previous study in Cameroon,[9] and unlike findings from elsewhere,[18] age, gender and living and rural area were not associated with ATT discontinuation in our study.

This study used administrative data routinely collected for the monitoring of the national programme against tuberculosis. Because such data collection is not comprehensive, we were unable to investigate the effects of some potential determinants of ATT discontinuation such as patient's knowledge about tuberculosis, distance from CDT to patient's residence, side effects of ATT and chronic alcohol abuse.[19-21] That no systematic effort was in place to trace patients who dropped out during the year of the study has probably introduced some biases in our ranking of patients according to the outcome of care. For instance, some patients who died in-between ATT drug collection visit would have been inappropriately classified as drop-out. However, the effects of misclassification if any would need to be very important to invalidate our findings.

In conclusion, ATT discontinuation in this setting is relatively high, and tends to occur more during the continuation phase of the treatment. Patients who receive treatment on the

1  
2  
3 outpatient basis during the intensive phase and those who do not consent for HIV screening  
4 are more likely to be those who will interrupt their ATT. Specific actions targeting these  
5 subgroups would likely improve the outcomes of care for tuberculosis in this centre.  
6  
7 Prospective studies are needed to investigate other determinants of ATT discontinuation and  
8 refine the incidence data based on a more objective ascertainment of the outcomes of care.  
9  
10  
11

12  
13  
14 **Competing interests** – None for all authors

15  
16 **Source of funding** – None

17  
18 **Authors' contribution** – EWPY conceived the study, supervised data collection, co-analysed  
19 the data and drafted of the manuscript; APK contributed to study designed, data analysis,  
20 drafting and critical revision of the manuscript; CK supervised the data collection and  
21 critically revised the manuscript.  
22  
23  
24  
25

## 26 REFERENCES

- 27 1. WHO. Tuberculosis profile, Cameroon. <https://extranet.who.int/sree/Reports>. (accessed 26  
28 Jun 2011).  
29
- 30 2. Aït-Khaled N, Alarcón E, Armengol R, et al. Prise en charge de la tuberculose. Guide des  
31 éléments essentiels pour une bonne pratique. (Sixième édition). Paris: Union Internationale  
32 Contre la Tuberculose et les Maladies Respiratoires 2010:P64.  
33
- 34 3. Programme National de Lutte contre la Tuberculose. Guide Technique pour le personnel de  
35 santé(2<sup>ème</sup> édition révisée). Yaoundé : Ministère de la Santé Publique du Cameroun 2004:P40.  
36
- 37 4. Maartens G, Wilkinson RJ. Tuberculosis. *Lancet* 2007;**370**:2030–43.  
38
- 39 5. Organisation Mondiale de la Santé. Le traitement de la tuberculose: Principes à l'intention  
40 des programmes nationaux (Troisième édition) Genève : OMS 2003:14-7.6.  
41
- 42 6. Kuaban C, Bame R, Mouangue L, et al. Non conversion of sputum smear positive in new  
43 smear positive pulmonary tuberculous patients in Yaounde, Cameroon. *East Afr Med J*  
44 2009;**86**:219-25.  
45
- 46 7. Castelnovo B. A review of compliance to anti tuberculosis treatment and risk factors for  
47 defaulting treatment in Sub Saharan Africa. *Afr Health Sci* 2010;**10**:320-4.  
48
- 49 8. Zellweger JP, Coulon P. Outcome of patients treated for tuberculosis in Vaud County,  
50 Switzerland. *Int J Tuberc Lung Dis* 1998;**2**:372-7.  
51  
52  
53  
54  
55  
56  
57  
58  
59  
60

- 1  
2  
3 9. Kuaban C, Mbuntum F. Treatment outcome and risk factors for default in adult with  
4 pulmonary tuberculosis in Yaounde, Cameroon. *Health Science & Disease* 2002;**1**:5-9.  
5  
6
- 7 10. Resolution WHA44.8. Tuberculosis control programme. In: *Handbook of resolutions and*  
8 *decisions of the World Health Assembly and the Executive Board*. Geneva: World Health  
9 Organization 1993 (WHA44/1991/REC/1):116.  
10  
11
- 12 11. Tekle B, Mariam DH, and Ali A. Defaulting from DOTS and its determinants in three  
13 districts of Arsi Zone in Ethiopia. *Int J Tuberc Lung Dis* 2002;**6**:573-9.  
14  
15
- 16 12. Kaona ADF, Tuba M, Siziya S, et al. An assessment of factors contributing to treatment  
17 adherence and knowledge of TB transmission among patients on TB treatment. *BMC Public*  
18 *Health* 2004;**4**:68.  
19  
20
- 21 13. Kruk ME, Schwalbe NR, Aguiar CA. Timing of default from tuberculosis treatment: a  
22 systematic review. *Trop Med Int Health* 2008;**13**:703-12.  
23  
24
- 25 14. International Union Against Tuberculosis and Lung Disease. Best Practice for the Care of  
26 Patients with Tuberculosis. Paris: USAID 2007:P51.  
27  
28
- 29 15. Caylà JA, Rodrigo T, Ruiz-Manzano J, et al. Working Group on Completion of  
30 Tuberculosis Treatment in Spain (Study ECUTTE). Tuberculosis treatment adherence and  
31 fatality in Spain. *Respir Res* 2009;**10**:121.  
32  
33
- 34 16. UNAIDS. “HIV and AIDS-related stigmatisation, discrimination and denial: forms,  
35 contexts and determinants,” research studies from Uganda and India (prepared for UNAIDS  
36 by Peter Aggleton). Geneva:UNAIDS 2000:1-28.  
37  
38
- 39 17. USAID. Breaking the cycle: Stigma, Discrimination, Internal stigma, and HIV. POLICY  
40 project (prepared for USAID by Ken Morrison) . Washington, DC: USAID2006:1-17.  
41  
42
- 43 18. Shargie EB, and Lindtjorn, B. Determinants of treatment adherence among smear-positive  
44 tuberculosis patients in Southern Ethiopia. *PLOS medicine* 2007;**4**:280-7.  
45  
46
- 47 19. Bam TS, Gunneberg C, Chamroonsawasdi K, et al. Factors affecting patient adherence to  
48 DOTS in urban Kathmandu, Nepal. *Int J Tuberc Lung Dis* 2006;**10**:270–6.  
49  
50
- 51 20. Chang KC, Leung CC, Tam CM. Risk factors for defaulting from antituberculosis  
52 treatment under directly observed treatment in Hong Kong. *Int J Tuberc Lung Dis* 2004;**8**:  
53 1492–98.  
54  
55  
56  
57  
58  
59  
60

1  
2  
3 21. Gelmanova IY, Keshavjee S, Golubchikova VT, et al. Barriers to successful tuberculosis  
4 treatment in Tomsk, Russian Federation: non-adherence, default and the acquisition of  
5 multidrug resistance. *Bull World Health Organ* 2007;**85**:703–11.  
6  
7  
8  
9  
10  
11  
12  
13  
14  
15  
16  
17  
18  
19  
20  
21  
22  
23  
24  
25  
26  
27  
28  
29  
30  
31  
32  
33  
34  
35  
36  
37  
38  
39  
40  
41  
42  
43  
44  
45  
46  
47  
48  
49  
50  
51  
52  
53  
54  
55  
56  
57  
58  
59  
60

For peer review only



**STROBE 2007 (v4) checklist of items to be included in reports of observational studies in epidemiology\***  
**Checklist for cohort, case-control, and cross-sectional studies (combined)**

| Section/Topic             | Item # | Recommendation                                                                                                                                                                                                                                                                                                                                                                                                                                                         | Reported on page # |
|---------------------------|--------|------------------------------------------------------------------------------------------------------------------------------------------------------------------------------------------------------------------------------------------------------------------------------------------------------------------------------------------------------------------------------------------------------------------------------------------------------------------------|--------------------|
| Title and abstract        | 1      | (a) Indicate the study's design with a commonly used term in the title or the abstract                                                                                                                                                                                                                                                                                                                                                                                 | 1                  |
|                           |        | (b) Provide in the abstract an informative and balanced summary of what was done and what was found                                                                                                                                                                                                                                                                                                                                                                    | 2                  |
| <b>Introduction</b>       |        |                                                                                                                                                                                                                                                                                                                                                                                                                                                                        |                    |
| Background/rationale      | 2      | Explain the scientific background and rationale for the investigation being reported                                                                                                                                                                                                                                                                                                                                                                                   | 4                  |
| Objectives                | 3      | State specific objectives, including any pre-specified hypotheses                                                                                                                                                                                                                                                                                                                                                                                                      | 4                  |
| <b>Methods</b>            |        |                                                                                                                                                                                                                                                                                                                                                                                                                                                                        |                    |
| Study design              | 4      | Present key elements of study design early in the paper                                                                                                                                                                                                                                                                                                                                                                                                                | 4,5                |
| Setting                   | 5      | Describe the setting, locations, and relevant dates, including periods of recruitment, exposure, follow-up, and data collection                                                                                                                                                                                                                                                                                                                                        | 4-6                |
| Participants              | 6      | (a) <i>Cohort study</i> —Give the eligibility criteria, and the sources and methods of selection of participants. Describe methods of follow-up<br><i>Case-control study</i> —Give the eligibility criteria, and the sources and methods of case ascertainment and control selection. Give the rationale for the choice of cases and controls<br><i>Cross-sectional study</i> —Give the eligibility criteria, and the sources and methods of selection of participants | 6,7                |
|                           |        | (b) <i>Cohort study</i> —For matched studies, give matching criteria and number of exposed and unexposed<br><i>Case-control study</i> —For matched studies, give matching criteria and the number of controls per case                                                                                                                                                                                                                                                 | /                  |
| Variables                 | 7      | Clearly define all outcomes, exposures, predictors, potential confounders, and effect modifiers. Give diagnostic criteria, if applicable                                                                                                                                                                                                                                                                                                                               | 6                  |
| Data sources/ measurement | 8*     | For each variable of interest, give sources of data and details of methods of assessment (measurement). Describe comparability of assessment methods if there is more than one group                                                                                                                                                                                                                                                                                   | 7                  |
| Bias                      | 9      | Describe any efforts to address potential sources of bias                                                                                                                                                                                                                                                                                                                                                                                                              | 5                  |
| Study size                | 10     | Explain how the study size was arrived at                                                                                                                                                                                                                                                                                                                                                                                                                              | 5                  |
| Quantitative variables    | 11     | Explain how quantitative variables were handled in the analyses. If applicable, describe which groupings were chosen and why                                                                                                                                                                                                                                                                                                                                           | 7                  |
| Statistical methods       | 12     | (a) Describe all statistical methods, including those used to control for confounding                                                                                                                                                                                                                                                                                                                                                                                  | 7                  |
|                           |        | (b) Describe any methods used to examine subgroups and interactions                                                                                                                                                                                                                                                                                                                                                                                                    | 7                  |
|                           |        | (c) Explain how missing data were addressed                                                                                                                                                                                                                                                                                                                                                                                                                            | 7                  |
|                           |        | (d) <i>Cohort study</i> —If applicable, explain how loss to follow-up was addressed<br><i>Case-control study</i> —If applicable, explain how matching of cases and controls was addressed                                                                                                                                                                                                                                                                              | /                  |

|                          |     |                                                                                                                                                                                                              |       |
|--------------------------|-----|--------------------------------------------------------------------------------------------------------------------------------------------------------------------------------------------------------------|-------|
|                          |     | <i>Cross-sectional study</i> —If applicable, describe analytical methods taking account of sampling strategy                                                                                                 |       |
|                          |     | (e) Describe any sensitivity analyses                                                                                                                                                                        |       |
| <b>Results</b>           |     |                                                                                                                                                                                                              |       |
| Participants             | 13* | (a) Report numbers of individuals at each stage of study—eg numbers potentially eligible, examined for eligibility, confirmed eligible, included in the study, completing follow-up, and analysed            | 7,8   |
|                          |     | (b) Give reasons for non-participation at each stage                                                                                                                                                         | 8     |
|                          |     | (c) Consider use of a flow diagram                                                                                                                                                                           | 8     |
| Descriptive data         | 14* | (a) Give characteristics of study participants (eg demographic, clinical, social) and information on exposures and potential confounders                                                                     | 8     |
|                          |     | (b) Indicate number of participants with missing data for each variable of interest                                                                                                                          | 8     |
|                          |     | (c) <i>Cohort study</i> —Summarise follow-up time (eg, average and total amount)                                                                                                                             | 9     |
| Outcome data             | 15* | <i>Cohort study</i> —Report numbers of outcome events or summary measures over time                                                                                                                          | 8     |
|                          |     | <i>Case-control study</i> —Report numbers in each exposure category, or summary measures of exposure                                                                                                         |       |
|                          |     | <i>Cross-sectional study</i> —Report numbers of outcome events or summary measures                                                                                                                           |       |
| Main results             | 16  | (a) Give unadjusted estimates and, if applicable, confounder-adjusted estimates and their precision (eg, 95% confidence interval). Make clear which confounders were adjusted for and why they were included | 9,11  |
|                          |     | (b) Report category boundaries when continuous variables were categorized                                                                                                                                    | 8,10  |
|                          |     | (c) If relevant, consider translating estimates of relative risk into absolute risk for a meaningful time period                                                                                             |       |
| Other analyses           | 17  | Report other analyses done—eg analyses of subgroups and interactions, and sensitivity analyses                                                                                                               | 10    |
| <b>Discussion</b>        |     |                                                                                                                                                                                                              |       |
| Key results              | 18  | Summarise key results with reference to study objectives                                                                                                                                                     | 11,12 |
| Limitations              | 19  | Discuss limitations of the study, taking into account sources of potential bias or imprecision. Discuss both direction and magnitude of any potential bias                                                   | 12    |
| Interpretation           | 20  | Give a cautious overall interpretation of results considering objectives, limitations, multiplicity of analyses, results from similar studies, and other relevant evidence                                   | 11,12 |
| Generalisability         | 21  | Discuss the generalisability (external validity) of the study results                                                                                                                                        | 13    |
| <b>Other information</b> |     |                                                                                                                                                                                                              |       |
| Funding                  | 22  | Give the source of funding and the role of the funders for the present study and, if applicable, for the original study on which the present article is based                                                | 13    |

\*Give information separately for cases and controls in case-control studies and, if applicable, for exposed and unexposed groups in cohort and cross-sectional studies.

**Note:** An Explanation and Elaboration article discusses each checklist item and gives methodological background and published examples of transparent reporting. The STROBE checklist is best used in conjunction with this article (freely available on the Web sites of PLoS Medicine at <http://www.plosmedicine.org/>, Annals of Internal Medicine at <http://www.annals.org/>, and Epidemiology at <http://www.epidem.com/>). Information on the STROBE Initiative is available at [www.strobe-statement.org](http://www.strobe-statement.org).

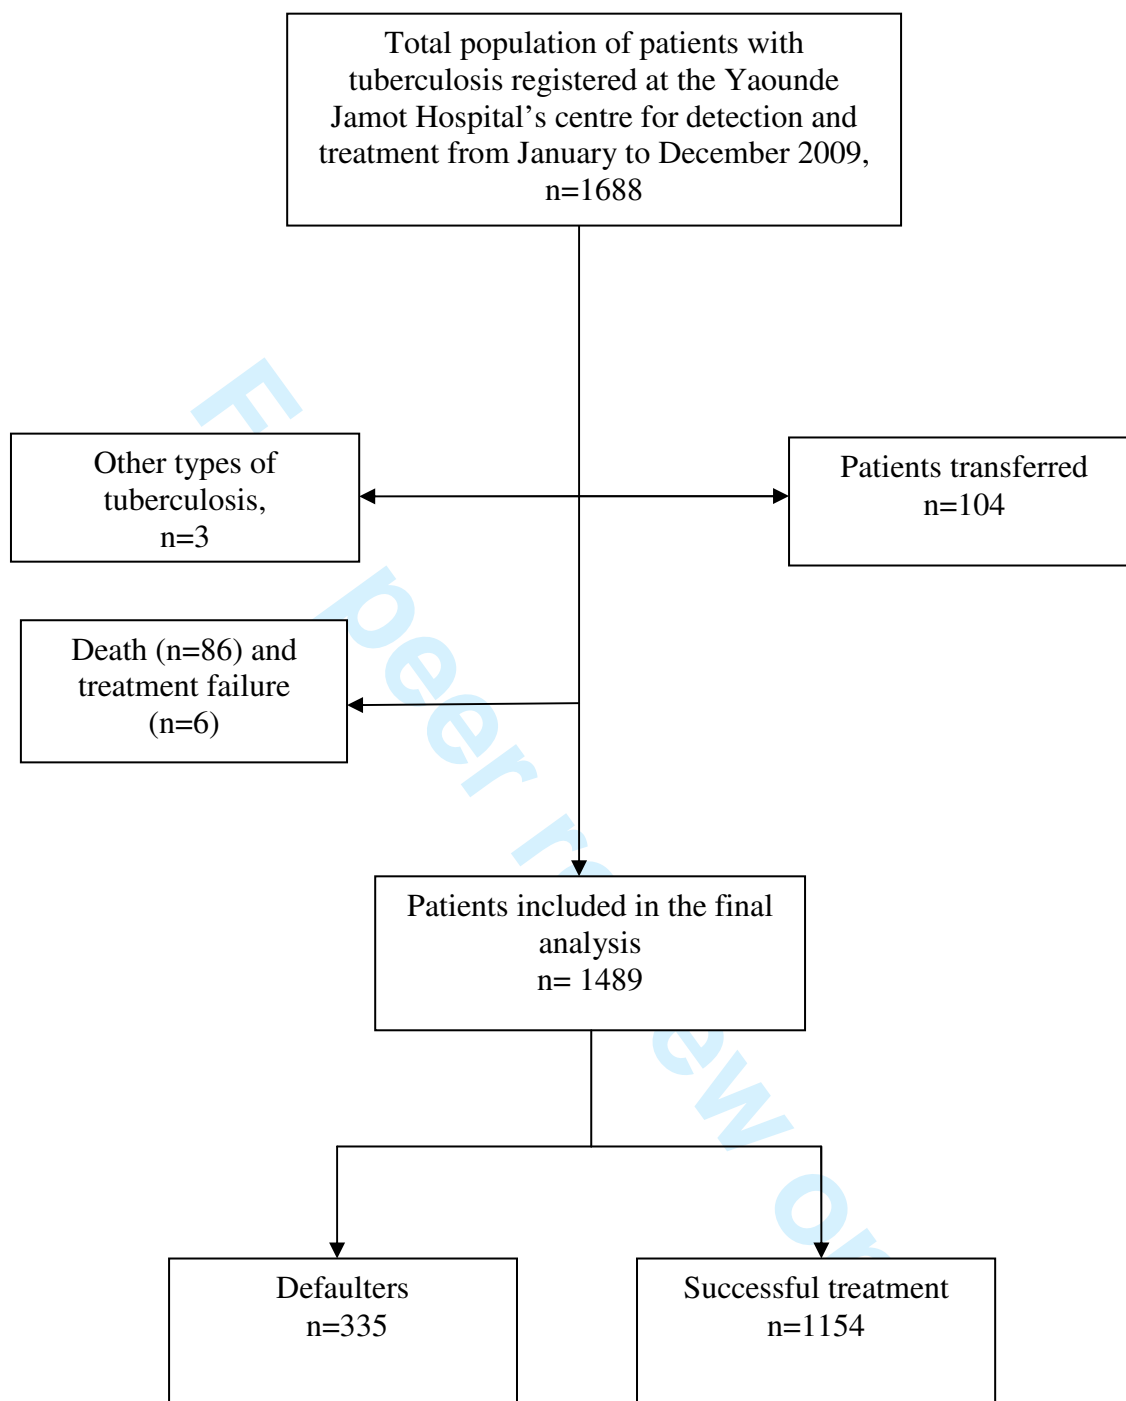

Figure 1 – Flow chart for inclusion of patients who defaulted and those with successful antituberculosis treatment at the Yaounde Jamot Hospital (YJH) in 2009

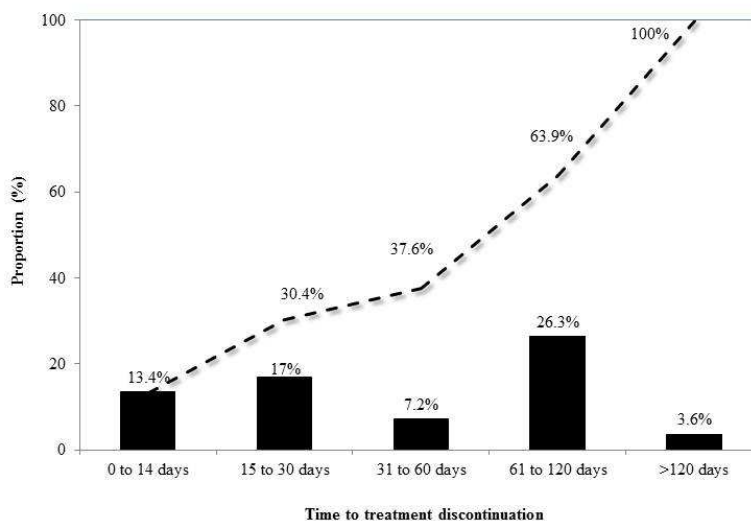

Figure 2 - Time to antituberculosis treatment discontinuation in 335 defaulters at the Yaounde Jamot Hospital in 2009

The vertical bars are proportional to the number of participants who stopped their treatment within the indicated time frame. The dotted superimposed curve is for the cumulative number of defaulter across time. Within each time frame, the frame specific proportion of defaulters is shown, together with the cumulative proportion of defaulters up to that time limit.

254x190mm (96 x 96 DPI)

only

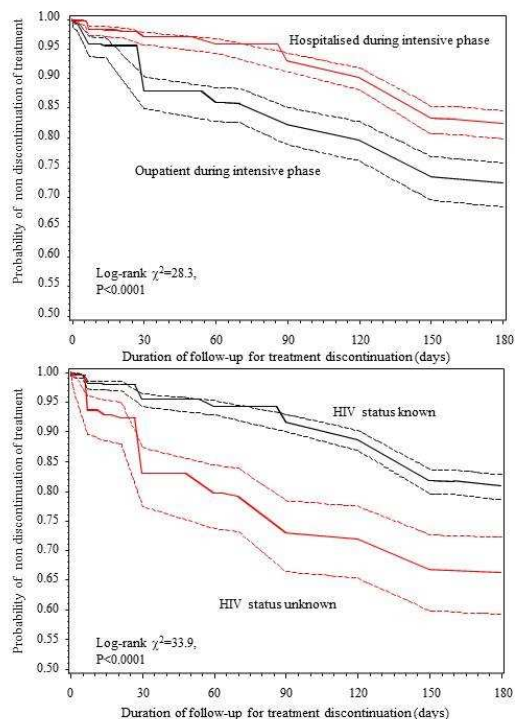

Figure 3 – Kaplan-Meier curves showing the probability of dropping out in subgroups defined by the setting of intensive treatment (upper panel) and knowledge of the status for HIV (lower panel) For each figure panel, the log-rank test results comparing the probability between subgroups are also shown.

254x190mm (96 x 96 DPI)

only

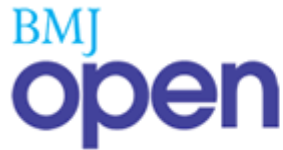

**Incidence, time and determinants of tuberculosis treatment default in Yaounde, Cameroon: a retrospective hospital register-based cohort study**

|                                 |                                                                                                                                                                                                                                                                                                                                                                                                                                                   |
|---------------------------------|---------------------------------------------------------------------------------------------------------------------------------------------------------------------------------------------------------------------------------------------------------------------------------------------------------------------------------------------------------------------------------------------------------------------------------------------------|
| Journal:                        | <i>BMJ Open</i>                                                                                                                                                                                                                                                                                                                                                                                                                                   |
| Manuscript ID:                  | bmjopen-2011-000289.R1                                                                                                                                                                                                                                                                                                                                                                                                                            |
| Article Type:                   | Research                                                                                                                                                                                                                                                                                                                                                                                                                                          |
| Date Submitted by the Author:   | 18-Sep-2011                                                                                                                                                                                                                                                                                                                                                                                                                                       |
| Complete List of Authors:       | Pefura Yone, Eric; Yaounde Jamot's Hospital; Faculty of Medicine and Biomedical Sciences, The University of Yaounde I, Department of Internal Medicine and specialties<br>Kengne, Andre; South African Medical research Council & University of Cape Town<br>Kuaban, Christopher; Yaounde Jamot's Hospital, Chest Unit; Faculty of Medicine and Biomedical Sciences, The University of Yaounde I, Department of Internal Medicine and specialties |
| <b>Primary Subject Heading</b>: | Infectious diseases                                                                                                                                                                                                                                                                                                                                                                                                                               |
| Keywords:                       | Tuberculosis < INFECTIOUS DISEASES, PUBLIC HEALTH, Thoracic medicine < INTERNAL MEDICINE                                                                                                                                                                                                                                                                                                                                                          |
|                                 |                                                                                                                                                                                                                                                                                                                                                                                                                                                   |

SCHOLARONE™  
Manuscripts

only

1  
2  
3 **Incidence, time and determinants of tuberculosis treatment default in Yaounde,**  
4 **Cameroon: a retrospective hospital register-based cohort study**  
5  
6

7 Short title: **Tuberculosis treatment default**  
8

9 Eric Walter PEFURA YONE (1, 2), André Pascal KENGNE (3), Christopher KUABAN (1,  
10 2)  
11  
12

13  
14 1) Department of Internal Medicine and specialties, Faculty of Medicine and Biomedical  
15 Sciences, The University of Yaounde I, Cameroon  
16

17  
18 2) Chest unit, Yaounde Jamot's Hospital, Yaounde, Cameroon  
19

20  
21 3) South African Medical research Council & University of Cape Town, South Africa  
22  
23  
24  
25

26 **Correspondence to:**  
27

28 Dr Eric Walter PEFURA YONE,  
29

30 Yaounde Jamot's Hospital,  
31

32 PO Box 4021-Yaounde, Cameroon  
33

34 Tel: (237)96539726, Fax: (237)22203165,  
35

36 Email: pefura2002@yahoo.fr  
37  
38  
39  
40  
41

42 **Tables: 2**  
43

44 **Figures: 2**  
45

46 **Online only material: 0**  
47

48 **Word count:** abstract-251; Main text (excluding tables, figures, abstract & references)-3,070  
49  
50

51 **References: 26**  
52  
53  
54  
55  
56  
57  
58  
59  
60

## Abstract

Background and purpose: High rates of antituberculosis treatment discontinuation have been reported in places in Africa. The aim of this study was to determine the rate, time to- and determinants of antituberculosis treatment default at the Yaounde Jamot's referral tuberculosis diagnosis and treatment centre.

Methods: All patients started on antituberculosis treatment at the centre between January and December 2009 were considered for inclusion on a retrospective basis. Tuberculosis treatment default or antituberculosis treatment discontinuation was defined as any interruption of treatment for at least 2 months, following treatment initiation. Sociodemographic and clinical predictors of treatment discontinuation were investigated with the use of Cox regressions models.

Results: Of the 1688 patients treated for tuberculosis in 2009, 337 (20%) defaulted from treatment, 86 (5.1%) died, treatment failed in 6 (0.4%) and 104 (6.2%) were transferred. Therefore, treatment was successfully completed in 1154 (68.4%) patients. Median duration to treatment discontinuation was 90 days (interquartile range: 30-150), and 62% of treatment discontinuation occurred during continuation phase. Hospitalisation during intensive phase [adjusted hazard ratio 0.69 (95% confidence interval: 0.54-0.89)] and non-consenting for HIV screening [1.65 (1.24-2.21)] were the main determinants of defaulting from treatment in multivariable analysis.

Conclusions: The default incidence rate is relatively high in this centre and treatment discontinuation occurs frequently during the continuation phase of the treatment. Actions are needed to improve adherence to treatment when taken on an ambulatory basis, clarify the association between HIV testing and defaulting to antituberculosis treatment, and identify other potential determinants of treatment discontinuation in this setting.

Word count – 251

Key words – tuberculosis, default, antituberculosis, treatment discontinuation, Cameroon



1  
2  
3 **Article focus:** What are the rates, time to- and determinants of antituberculosis treatment  
4 discontinuation in the era of directly observed treatment in sub-Saharan Africa, using the case  
5 of Cameroon for illustration?  
6  
7  
8  
9

10  
11 **Key messages:** Antituberculosis treatment success rates remain non-optimal in sub-Saharan  
12 Africa where the highest global incidence rates for tuberculosis are found. Treatment  
13 discontinuation is one of the main reasons, but has been less explored in Africa in recent  
14 times.  
15  
16  
17  
18  
19

20  
21 Knowledge of determinants of antituberculosis treatment discontinuation is critical for  
22 informing health service and policy solutions needed to improve the outcomes of care for  
23 tuberculosis and contain the spread of the disease.  
24  
25  
26  
27  
28

29 **Strengths:** Large cohort study with up to 1688 participants  
30  
31

32 **Limitations:** retrospective study with lack of some information  
33  
34  
35  
36  
37  
38  
39  
40  
41  
42  
43  
44  
45  
46  
47  
48  
49  
50  
51  
52  
53  
54  
55  
56  
57  
58  
59  
60

## INTRODUCTION

Tuberculosis is highly endemic in the majority of sub-Saharan African (SSA) countries where highest global annual incidence rates are recorded.[1] The expected therapeutic success target of 85% among newly diagnosed individuals with positive smear is largely unachieved in many settings in SSA.[1] Defaulting from tuberculous treatment is one of the reasons for this non-optimal performance. Tuberculosis treatment default or antituberculosis treatment (ATT) discontinuation is defined as any interruption of **antituberculosis treatment** for at least 2 months, following treatment initiation.[2,3] **Antituberculosis treatment discontinuation** is associated with disease reoccurrence following treatment, increased mortality, maintenance of micro-organisms reservoirs and emergence drug-resistant species of mycobacterium.[4]

The directly observed treatment (DOT) strategy has been recommended by the World Health Organisation (WHO),[5] for improving the outcome of care for tuberculosis. Implementation of the DOT strategy started in Cameroon in the mid 90's and was expanded to the entire country in the years 2000. Despite this, available evidence suggests that **antituberculosis treatment** discontinuation has remained relatively high.[6] Many factors have been linked with **antituberculosis treatment** discontinuation in SSA including infrequent bacilloscopic monitoring, transfer of patients across health services units, lack of family support, side effects of medications, **health care systems factors and patient misinformation**. [7-9] In general, studies on the determinants of **antituberculosis treatment** discontinuation in Africa and in Cameroon are mostly out-dated and less reflective of the **DOT and highly active anti-retroviral therapy (HAART)** eras, and the few relevant studies are heterogeneous. [7, 8] In addition, none of the relevant study has been conducted in Cameroon after DOT implementation in this country. **In this context therefore, updated information are needed on antituberculosis treatment discontinuation and determinants that reflects both the DOT era and recent improvements in the access to HIV testing and treatment, in order to guide further improvement in the outcomes of care for tuberculosis.**

The aim of the current study was to assess the incidence rate, determinants and time to **antituberculosis treatment** discontinuation in the real-life settings of a historical diagnosis and treatment centre for tuberculosis in Yaounde, Cameroon.

## METHODS

### Study setting

1  
2  
3 The study was conducted in the pneumology service of Yaounde Jamot Hospital (YJH). The  
4 **Yaounde Jamot Hospital** serves a referral centre for tuberculosis and respiratory diseases for  
5 the capital city of Cameroon (Yaounde) and surrounding areas. It is one of the major centres  
6 for diagnosis and treatment of tuberculosis (CDT) in Cameroon. The pneumology service of  
7 **Yaounde Jamot Hospital** is a 257 bedded service and 11% of all cases of tuberculosis  
8 diagnosed in Cameroon in 2009 were managed in this service. Since five years, about 1600 to  
9 1800 patients with tuberculosis are diagnosed and treated by the **Centre for Diagnosis and**  
10 **Treatment of tuberculosis**. The **Yaounde Jamot Hospital** also hosts an approved treatment  
11 centre (ATC) that provides care to people living with Human Immunodeficiency Virus (HIV)  
12 infection. Patients received at the **Diagnosis and Treatment Centre of tuberculosis** during  
13 January to December 2009 were considered for inclusion in the study. The study was  
14 approved by the administrative authorities of the Yaounde Jamot Hospital.

### 25 **Definition and classification of tuberculosis cases**

26  
27 Patients who receive care at the **Centre for Diagnosis and Treatment of tuberculosis** of  
28 **Yaounde Jamot Hospital** are consecutively registered as they are started on treatment. For  
29 patients with a past exposure to **antituberculosis treatment**, the approach is nearly similar.  
30 Those patients who report back to the centre with active tuberculosis and who have been  
31 treated in the past for at least one month are registered again with a new number and started  
32 on a standardised re-treatment regimen. The following international definitions are applied:  
33 [2, 3, 5] 1) smear-positive pulmonary tuberculosis (PTB+) - acid-fast bacillary (AFB) found  
34 in at least two sputum specimens; 2) smear-negative pulmonary tuberculosis (PTB-) –  
35 persisting negativity on three sputum examinations after ten-day course of non-specific  
36 antibiotic treatment in a patient with tuberculosis-like clinical and radiological signs, and in  
37 the absence of any obvious cause; 3) extra-pulmonary tuberculosis – tuberculosis involving  
38 organs other than the lungs. Patients with past exposure to **antituberculosis treatment** are  
39 usually smear-positive [2] and are further classified as “relapse” (i.e. reoccurrence of the  
40 disease following a successful **antituberculosis treatment** course), “failure” (i.e. positive smear  
41 after five months of **antituberculosis treatment**) and “treatment after default” (i.e. starting  
42 **tuberculosis treatment** again after two consecutive months of interruption). A “new case” is a  
43 patient with tuberculosis who has never been exposed to **antituberculosis treatment** for more  
44 than one month in the past. “Other cases of tuberculosis” refers to patients who cannot fit in  
45 one of the categories described above (i.e. **patient relapsing for a second time for tuberculosis**,

with involved mycobacterium being sensitive to antituberculosis, and treated for 6 months with standard regimens).

### Detection and management of HIV infection

At the Centre for Diagnosis and Treatment of tuberculosis of the Yaounde Jamot Hospital, all patients with tuberculosis are screened for HIV infection free of charge after informed consent has been obtained from the patient or relative for dependant patients. This includes detection of anti-HIV 1 and anti-HIV 2 antibodies in the serum with the use of two rapid tests: Determine® HIV 1/2 (Abbot laboratories, Tokyo, Japan) and Immunocomb® II HIV 1 and 2 Bispot (Organics, Courbevoie, France). A patient is classified as HIV positive when the two tests are positive. For discordant tests, a confirmatory western blot test (New Lav Blot, Sanofi diagnostics-Pasteur) is conducted. All HIV-positive patients are started on prophylaxis with cotrimoxazole and those with CD4 lymphocytes count  $<200/\text{mm}^3$  (or  $<15\%$  of the total lymphocyte count in those  $<15$  years of age) are started on triple antiretroviral therapy free of charge. Initial antiretroviral regimens are the combinations lamivudine-zidovudine-efavirenz or lamivudine-stavudine-efavirenz.

### Tuberculosis treatment

Tuberculosis treatment at the Centre for Diagnosis and Treatment of tuberculosis is based on the DOT approach, in accordance with the guidelines of the Cameroon National Programme Against Tuberculosis (NPAT) and the WHO recommendations.[2, 3] Patients are either admitted during the intensive phase (IP) of antituberculosis treatment, or treated as outpatient. Antituberculosis drugs are dispensed free of charge to all patients. Treatment regimens used are standard regimens of category I for new patients and of category II for re-treatment cases. New cases are treated with a regimen that includes an intensive phase of two months duration with rifampicin (R), isoniazid (H), ethambutol (E) and pyrazinamide (Z), followed by a 4-month continuation phase with rifampicin and isoniazid. During re-treatment, category I medications (R, H, E, Z) are completed with streptomycin (S). Therefore, re-treatment cases are treated with RHEZS for two months, followed by one month on RHEZ and five months on RHE. During the intensive phase, adherence is directly monitored by the healthcare team for patients admitted, and during weekly drug collection in those treated as outpatients. The continuation phase is conducted on the outpatient basis and adherence assessed during monthly drugs collection visits.

## Monitoring and outcomes of tuberculosis treatment

During **antituberculosis treatment**, PTB+ patients are re-examined for AFB at the end of month 2, 5 and 6 for new cases, and at the end of month 3, 5 and 8 in case of re-treatment. PTB- and patients with extra-pulmonary tuberculosis are monitored clinically and/or radiologically at the same frequency. At the end of the treatment, patients are ranked into mutually exclusive categories as:[2] 1) cured – patient with negative smear at the last month of treatment and at least one of the preceding; 2) treatment completed – patient who has completed the treatment and for whom the smear result at the end of the last month is not available; 3) failure – patient with at least two positive smear at the 5<sup>th</sup> month or later during treatment; 4) death – death from any cause during treatment; 5) defaulter – patient who's treatment has been interrupted for at least two consecutive months; 6) transfer – patient transferred to complete his treatment in another centre and who's treatment outcome is unknown.

## Data collection

Tuberculosis treatment registers and **antituberculosis treatment** forms of the YJH's **Centre for Diagnosis and Treatment of tuberculosis** served as basis for data collection for the study. Data were collected on age, sex, residence (urban vs. rural), history of exposure to **antituberculosis treatment**, localisation of tuberculosis infection, status for HIV infection, CD4 lymphocyte count (in those with HIV infection), intensive **antituberculosis treatment** setting (hospital vs. ambulatory), outcome of **tuberculosis treatment** and time to treatment discontinuation. Cured and **tuberculosis treatment** completion were considered as favourable outcome (successful treatment) while death, default and failure were considered as unfavourable outcome.[10]

## Statistical methods

Data analysis used SPSS® v.12.0.1 for Windows® (SPSS Inc., Chicago, USA) and SAS/STAT® v 9.1 for windows (SAS Institute Inc., Cary, NC, USA). Results are presented as count (proportions) and median (interquartile range, IQR). **Group comparisons used chi square test and equivalents for qualitative variables, and analysis of the variance (ANOVA) and equivalents for quantitative variables.** Cox proportional hazard regression models were used to relate baseline characteristics with treatment discontinuation during follow-up. Exploratory analyses were adjusted for age and sex; then all significant predictors identified were entered into the same multivariable model adjusted for sex and age. All Cox models

1  
2  
3 were stratified by type of patients (i.e. new patient, retreatment) to account for differences in  
4 the duration of treatment. Kaplan-Meier estimator was also used to depict the probability of  
5 treatment discontinuation across strata of significant predictors and group comparisons made  
6 with the use of the log-rank test. A p-value<0.05 was used to characterise statistically  
7 significant results.  
8  
9  
10  
11

## 12 13 14 RESULTS

### 15 16 Study population and **antituberculosis treatment discontinuation rate**

17  
18 **Between January and December 2009**, 1688 patients with tuberculosis were registered at the  
19 **Centre for Diagnosis and Treatment of tuberculosis**. Their demographic, clinical profile and  
20 outcomes are summarised in Table 1. **They were aged 32 years (interquartile range: 25-42**  
21 **years) and 954 (56.5%) were men. Clinical forms of tuberculosis were: 1231 (73%) for PTB+,**  
22 **168 (10%) for PTB- and 289 (17%) for EPTB. The cumulative incidence rate of**  
23 **antituberculosis treatment discontinuation was 20% and the treatment success rate was 68.4%.**  
24  
25  
26  
27  
28  
29  
30  
31  
32  
33  
34  
35  
36  
37  
38  
39  
40  
41  
42  
43  
44  
45  
46  
47  
48  
49  
50  
51  
52  
53  
54  
55  
56  
57  
58  
59  
60

**Table 1: Characteristics of patients with tuberculosis according to the treatment outcome at the Yaounde Jamot Hospital in 2009**

| Characteristics                         | Categories        | Total            | Outcomes of tuberculosis treatment |            |            |            |              | P-value |
|-----------------------------------------|-------------------|------------------|------------------------------------|------------|------------|------------|--------------|---------|
|                                         |                   |                  | Treatment success*                 | Failure    | Deaths     | Defaulted  | Transferred  |         |
| N(%)                                    |                   | 1688             | 1155 (68.4)                        | 6 (0.4)    | 86 (5.1)   | 337 (20.0) | 104 (6.2)    |         |
| Age, years                              | ≤15               | 39 (2.3)         | 33 (84.6)                          | 0 (0)      | 0 (0)      | 5 (12.8)   | 1 (2.6)      | <0.031  |
|                                         | >15-59            | 1554 (92.1)      | 1067 (68.7)                        | 5 (0.3)    | 75 (4.8)   | 310 (19.9) | 97 (6.2)     |         |
|                                         | ≥ 60              | 95 (5.6)         | 55 (57.9)                          | 1 (1.1)    | 11(11.6)   | 22 (23.2)  | 6 (6.3)      |         |
|                                         | Median (IQR)      | 32 (25-42)       | 32 (24-42)                         | 35 (26-48) | 45 (32-54) | 32 (25-42) | 35.5 (24-42) | <0.001  |
| Men                                     |                   | 954 (56.5)       | 650 (68.1)                         | 4 (0.4)    | 50 (5.2)   | 195 (20.4) | 55 (5.8)     | 0.882   |
| Residence                               | Urban             | 1423/1662 (85.6) | 995 (69.9)                         | 5 (0.4)    | 72 (5.1)   | 283 (19.9) | 68 (4.8)     | <0.001  |
|                                         | Rural             | 239/1662 (14.4)  | 144 (60.3)                         | 1 (0.4)    | 13 (5.4)   | 47 (19.7)  | 34 (14.2)    |         |
| Place of screening                      | This centre       | 1625 (96.3)      | 1115 (68.6)                        | 6 (0.4)    | 84 (5.2)   | 319 (19.6) | 101 (6.2)    | 0.269   |
|                                         | Elsewhere         | 63 (3.7)         | 40 (63.5)                          | 0 (0)      | 2 (3.2)    | 18 (28.6)  | 3 (4.8)      |         |
| Setting of intensive phase of treatment | Hospitalisation   | 1098 (65.0)      | 772 (70.3)                         | 3 (0.3)    | 69 (6.3)   | 179 (16.3) | 75 (6.8)     | <0.001  |
|                                         | Outpatient        | 590 (35.0)       | 383 (64.9)                         | 3 (0.5)    | 17 (2.9)   | 158 (26.8) | 29 (4.9)     |         |
| Clinical forms                          | PTB+              | 1231 (72.9)      | 860 (69.9)                         | 6 (0.5)    | 16 (4.5)   | 239 (19.4) | 70 (5.7)     | 0.012   |
|                                         | PTB-              | 168 (10.0)       | 95 (56.5)                          | 0 (0)      | 16 (9.5)   | 45 (26.8)  | 12 (7.1)     |         |
|                                         | ETB               | 289 (17.1)       | 200 (69.2)                         | 0 (0)      | 14 (4.8)   | 53 (18.3)  | 22 (7.6)     |         |
| Type of patient                         | New cases         | 1543 (91.4)      | 1059 (68.6)                        | 5 (0.3)    | 81 (5.2)   | 299 (19.4) | 99 (6.4)     | 0.20    |
|                                         | Retreatment cases | 145 (8.6)        | 96 (66.2)                          | 1 (0.7)    | 5 (3.4)    | 38 (26.2)  | 5 (3.4)      |         |
| HIV serology                            | Not done          | 241 (14.3)       | 122 (50.6)                         | 2 (0.8)    | 20 (8.3)   | 72 (29.9)  | 25 (10.4)    | <0.001  |
|                                         | Negative          | 942 (55.8)       | 703 (74.6)                         | 4 (0.4)    | 17 (1.8)   | 166 (18)   | 50 (5.4)     |         |
|                                         | Positive          | 497/1419 (35)    | 330 (65.3)                         | 0 (0)      | 49 (9.7)   | 97 (19.2)  | 29 (5.7)     |         |
| Sputum smear conversion £               | Yes               | 1378/1471 (93.7) | 1072 (77.8)                        | 0 (0)      | 13 (0.9)   | 229 (16.6) | 64 (4.6)     | <0.001  |
|                                         | No                | 93/1471 (6.3)    | 82.8)                              | 4 (4.3)    | 0 (0)      | 10 (10.8)  | 2 (2.2)      |         |

Data are number (%) unless otherwise indicated; IQT, interquartile range; ETB, extra-pulmonary tuberculosis; PTB+, smear positive pulmonary tuberculosis; PTB-, smear negative pulmonary tuberculosis; \*treatment success = cured+completed; £ at the end of intensive phase (applicable only to patients with smear positive tuberculosis)

### Time to tuberculosis treatment discontinuation

Antituberculosis treatment interruption in 210 patients (62.3%) occurred during continuation phase of treatment (Figure 1) and the median (IQR) duration to tuberculosis treatment discontinuation was 90 days (30-150). Tuberculosis treatment discontinuation was more likely to occur during continuation phase in those hospitalised during intensive phase than in those treated as outpatients [134 (74.9%) vs. 77 (48.7%),  $p < 0.0001$ ].

### Determinants of treatment discontinuation

The probability of treatment discontinuation according to setting for intensive treatment and whether HIV test was done is depicted in Figure 2. At each time point during follow-up the probability of treatment discontinuation was always lower in patients hospitalized during intensive treatment phase than in those treated as outpatients during intensive phase. Similarly, discontinuation probability was always lower in patients with known status for HIV infection than in those with unknown status.

Cox regression models were used to examine predictors of treatment discontinuation using the observed follow-up duration for all participants in the overall cohort. In models adjusted for age and sex, hospitalisation during intensive phase reduced the risk of treatment discontinuation [hazard ratio (HR) 0.58, 95% confidence interval (95% CI): 0.46-0.72], while having PTB- [1.59 (1.15-2.21)] or unknown status for HIV infection [1.28 (1.17-1.41)] significantly increased the risk of treatment discontinuation. With further adjustment for those variables that were significant in basic models, ambulatory treatment during intensive phase and unknown status for HIV infection were the main determinants of antituberculosis treatment discontinuation (Table 2).



**Table 2: Hazard ratio (HR) and 95% confidence interval (95% CI) for predictors of antituberculosis treatment discontinuation from Cox regression analysis**

| Characteristics                      | Basic models     |         | Final models     |        |
|--------------------------------------|------------------|---------|------------------|--------|
|                                      | HR (95% CI)      | p       | HR (95%CI)       | p      |
| <b>Age (per year)</b>                | 1.01 (1.00-1.01) | 0.121   | 1.01 (1.00-1.01) | 0.133  |
| <b>Sex (women vs. men)</b>           | 0.96 (0.77-1.20) | 0.723   | 0.99(0.79-1.23)  | 0.922  |
| <b>Hospitalised intensive phase</b>  | 0.58 (0.46-0.72) | <0.0001 | 0.69 (0.54-0.89) | 0.004  |
| <b>Residence (urban vs. rural)</b>   | 0.92(0.67-1.26)  | 0.596   | /                | /      |
| <b>Clinical form of tuberculosis</b> |                  |         |                  |        |
| <b>Positive smear (Reference)</b>    | 1.00 (reference) |         | 1.00 (reference) |        |
| <b>Negative smear</b>                | 1.59( 1.15-2.21) | 0.005   | 1.25 (0.89-1.76) | 0.192  |
| <b>Extra-pulmonary</b>               | 0.99(0.73-1.34)  | 0.948   | 0.96(0.71-1.30)  | 0.780  |
| <b>Unknown status for HIV</b>        | 1.28 (1.17-1.41) | <0.0001 | 1.65 (1.24-2.21) | 0.0007 |

HIV, Human Immunodeficiency Virus; Basic models are adjusted for age and sex; and final models further adjust for all significant predictors in basic models. All Cox models are stratified by type of patients (i.e. new patient, retreatment) to account for difference in the duration of treatment.

## DISCUSSION

In this study, we have assessed the incidence of antituberculosis treatment discontinuation and predictors of treatment discontinuation in a large cohort of patients treated for tuberculosis in a major referral centre in Cameroon. Treatment success rate was 68.4% and the cumulative incidence of treatment discontinuation was 20% overall and 19.4% among patients with smear-positive pulmonary tuberculosis. Discontinuation was most likely to occur during continuation phase of treatment and mostly among those treated as outpatients during intensive phase and patients with unknown status for HIV infection.

1  
2  
3 Treatment discontinuation in our study was based on the World Health Organisation's  
4 definition, which refers to a defaulter as a patient who's treatment has been discontinued for  
5 at least two consecutive months.[2] Compared with other few studies from Africa that have  
6 used similar definition, discontinuation rate in our cohort was similar to that reported by  
7 Shargie and co-workers in South Ethiopia, [11] lower than the rate found by Kaona and his  
8 colleagues in Zambia,[12] and higher than the rate by Tekle et al in Arsi in Ethiopia.[13] The  
9 above studies however differs from our study in a number of respects. The largest of those  
10 studies had 20% fewer patients than our cohort,[13] while the two others had less than ¼ the  
11 number of participants in our sample. [11, 12]. Furthermore, the two studies in Ethiopia  
12 involved only rural participants, with one based only on patients with smear-positive  
13 tuberculosis,[12], while the study in Zambia was based on a cross-sectional sample of urban  
14 dwellers.[13] In general, it has been recognised that using a stricter definition for treatment  
15 discontinuation results in much higher rates than when using the World Health Organisation's  
16 definition.[7]

17  
18 Before the reorganisation of the fight against tuberculosis in Cameroon and roll out of the  
19 DOT strategy, antituberculosis treatment discontinuation rate was 31.7% among adults with  
20 PTB+ in the Yaounde Jamot Hospital.[14] Our study would tend to suggest that  
21 implementation of the DOT strategy has positively impacted on antituberculosis treatment  
22 discontinuation, with a 12% drop, although much efforts are still needed to bring the rate  
23 below 10%. The currently observed discontinuation rates are twice higher than the expected  
24 <10%, a requirement if the 85% antituberculosis treatment success rates prescribed in the  
25 millennium development goals are to be achieved.[15] Treatment discontinuation is a major  
26 challenge to programmes against tuberculosis, in the sense that non-adherence to  
27 antituberculosis treatment is associated with reoccurrence of the disease, preservation of  
28 reservoirs for micro-organism dissemination, emergence of drug resistant species of  
29 mycobacterium and increased tuberculosis related deaths.[16]

30  
31 Two out of three patients who defaulted to treatment in our study did so during the  
32 continuation phase of tuberculosis treatment. Predominantly late antituberculosis treatment  
33 discontinuation (i.e. after the intensive phase) has also been confirmed in a systematic  
34 review.[17] This late discontinuation could partly be explained by the improved condition of  
35 the patient following the intensive phase of antituberculosis treatment. It is possible that  
36 patients who feel clinically better following this phase are less motivated to continue the  
37 treatment as they don't feel the need to do so.[16]

1  
2  
3  
4  
5 **Tuberculosis treatment** on the outpatient basis during the intensive phase and unknown status  
6 for HIV were the main determinants of treatment discontinuation found in our study. This  
7 would tend to suggest that direct daily supervision reduces the risk of drop out. This could be  
8 explained at least in part by the fact that those who receive **antituberculosis treatment** as in-  
9 patient during intensive phase also receive more education on the disease, the duration and  
10 outcome of care and are therefore more motivated to observe the treatment for the required  
11 duration. Two studies from Ethiopia and Zambia have reported that poor knowledge of  
12 **antituberculosis treatment** duration among patients was associated with high risk of treatment  
13 discontinuation.[12,13] Unlike our results however, another study in Spain found no  
14 protective effect of DOT on **antituberculosis treatment** discontinuation.[18] Patients with  
15 unknown status for HIV in our study are more likely to be those who did not consent for the  
16 test, since cost is not a constraint for HIV screening in our setting. It is possible that faced  
17 with the persisting invitation from healthcare personnel to accept HIV screening, some of the  
18 non-consenting patient would prefer to stop the **antituberculosis treatment** and walk away  
19 from the programme. The stigmatisation of people living with HIV is a reason for not-  
20 consenting for screening.[19,20] We can also speculate that **antituberculosis treatment**  
21 discontinuation is not the direct consequence of not-consenting for HIV screening, but the  
22 latter is just an indicator of the profile of those patients who will adhere less to any medical  
23 prescription. The effects of non-consenting for HIV screening on **antituberculosis treatment**  
24 discontinuation have not been **investigated** by other studies.[7] In agreement with a previous  
25 study in Cameroon,[14] and unlike findings from elsewhere,[11] age, gender and living and  
26 rural area were not associated with **antituberculosis treatment** discontinuation in our study.  
27  
28 This study used administrative data routinely collected for the monitoring of the national  
29 programme against tuberculosis. Because such data collection is not comprehensive, we were  
30 unable to investigate the effects of some potential determinants of **antituberculosis treatment**  
31 discontinuation such as patient's knowledge about tuberculosis, distance from Centre for  
32 Diagnosis and Treatment of tuberculosis to patient's residence, side effects of **antituberculosis**  
33 **treatment** and chronic alcohol abuse.[8, 9, 21-23] That no systematic effort was in place to  
34 trace patients who **interrupted their treatment** during the year of the study has probably  
35 introduced some biases in our ranking of patients according to the outcome of care. For  
36 instance, some patients who died in-between drugs collection visit would have been  
37 inappropriately classified as **defaulters, particularly among HIV infected patients** [24-26]. Our  
38  
39  
40  
41  
42  
43  
44  
45  
46  
47  
48  
49  
50  
51  
52  
53  
54  
55  
56  
57  
58  
59  
60

1  
2  
3 study also has major strengths including the large population and inclusion of common forms  
4 of tuberculosis in this setting. Unlike recent studies on this topic in Africa, assessment of  
5 predictors of treatment discontinuation used robust methods to account both for the observed  
6 time to treatment discontinuation as well as differences in the duration of treatment for  
7 various forms of tuberculosis.[7] Those studies have either been based in patients with HIV  
8 and tuberculosis, or lacked information on status for HIV. Accordingly, none has investigated  
9 the effects of HIV testing on the outcome of care for tuberculosis; what our study has  
10 successfully done.

11  
12 In conclusion, antituberculosis treatment discontinuation in this setting is relatively high, and  
13 tends to occur more during the continuation phase of the treatment. Patients who receive  
14 treatment on the outpatient basis during the intensive phase and those who do not consent for  
15 HIV screening are more likely to be those who will interrupt their antituberculosis treatment.  
16 Specific actions targeting these subgroups would likely improve the outcomes of care for  
17 tuberculosis in this centre. That patients treated entirely on ambulatory basis were less like to  
18 achieve good outcomes of care as compared to those hospitalised during intensive treatment  
19 phase, together with much higher discontinuation rates in the same setting in the pre-DOT era,  
20 all suggest that DOT strategy is associated with improved outcomes of care for tuberculosis in  
21 this setting. Prospective studies are needed to investigate other determinants of  
22 antituberculosis treatment discontinuation and refine the incidence data based on a more  
23 objective ascertainment of the outcomes of care.

24  
25  
26  
27  
28  
29  
30  
31  
32  
33  
34  
35  
36  
37  
38  
39  
40  
41 **Competing interests** – None for all authors

42 **Source of funding** – None

43  
44 **Authors' contribution** – EWPY conceived the study, supervised data collection, co-analysed  
45 the data and drafted of the manuscript; APK contributed to study designed, data analysis,  
46 drafting and critical revision of the manuscript; CK supervised the data collection and  
47 critically revised the manuscript.

## 48 49 50 51 52 53 **REFERENCES**

54  
55  
56 1. WHO. Tuberculosis profile, Cameroon. <https://extranet.who.int/sree/Reports>. (accessed 26  
57 Jun 2011).

- 1  
2  
3 2. Aït-Khaled N, Alarcón E, Armengol R, et al. Prise en charge de la tuberculose. Guide des  
4 éléments essentiels pour une bonne pratique. (Sixième édition). Paris: Union Internationale  
5 Contre la Tuberculose et les Maladies Respiratoires 2010:P64.  
6  
7
- 8  
9 3. Programme National de Lutte contre la Tuberculose. Guide Technique pour le personnel de  
10 santé(2<sup>ème</sup> édition révisée). Yaoundé : Ministère de la Santé Publique du Cameroun 2004:P40.  
11  
12
- 13 4. Maartens G, Wilkinson RJ. Tuberculosis. *Lancet* 2007;**370**:2030–43.  
14  
15
- 16 5. Organisation Mondiale de la Santé. Le traitement de la tuberculose: Principes à l'intention  
17 des programmes nationaux (Troisième édition) Genève : OMS 2003:14-7.6.  
18  
19
- 20 6. Kuaban C, Bame R, Mouangue L, et al. Non conversion of sputum smear positive in new  
21 smear positive pulmonary tuberculous patients in Yaounde, Cameroon. *East Afr Med J*  
22 2009;**86**:219-25.  
23  
24
- 25 7. Castelnovo B. A review of compliance to anti tuberculosis treatment and risk factors for  
26 defaulting treatment in Sub Saharan Africa. *Afr Health Sci* 2010;**10**:320-4.  
27  
28
- 29 8. Elbireer S, Guwatudde D, Mudiope P, et al. Tuberculosis treatment default among HIV-TB  
30 co-infected patients in urban Uganda. *Trop Med Int Health* 2011;**18**:doi: 10.1111/j.1365-  
31 3156.2011.02800.x.  
32  
33
- 34 9. Kandel TR, Mfenyana K, Chandia J, et al. The prevalence of and reasons for interruption of  
35 anti-tuberculosis treatment by patients at Mbekweni Health Centre in the King Sabata  
36 Dalindyebo (KSD) District in the Eastern Cape province. *SA Fam Pract* 2008;**50**:47.  
37  
38
- 39 10. Zellweger JP, Coulon P. Outcome of patients treated for tuberculosis in Vaud County,  
40 Switzerland. *Int J Tuberc Lung Dis* 1998;**2**:372-7.  
41  
42
- 43 11. Shargie EB, and Lindtjorn, B. Determinants of treatment adherence among smear-positive  
44 tuberculosis patients in Southern Ethiopia. *PLOS medicine* 2007;**4**:280-7.  
45  
46
- 47 12. Kaona ADF, Tuba M, Siziya S, et al. An assessment of factors contributing to treatment  
48 adherence and knowledge of TB transmission among patients on TB treatment. *BMC Public*  
49 *Health* 2004;**4**:68.  
50  
51
- 52 13. Tekle B, Mariam DH, and Ali A. Defaulting from DOTS and its determinants in three  
53 districts of Arsi Zone in Ethiopia. *Int J Tuberc Lung Dis* 2002;**6**:573-9.  
54  
55  
56  
57  
58  
59  
60

- 1  
2  
3 14. Kuaban C, Mbuntum F. Treatment outcome and risk factors for default in adult with  
4 pulmonary tuberculosis in Yaounde, Cameroon. *Health Science & Disease* 2002;**1**:5-9.  
5  
6  
7 15. Resolution WHA44.8. Tuberculosis control programme. In: *Handbook of resolutions and*  
8 *decisions of the World Health Assembly and the Executive Board*. Geneva: World Health  
9 Organization 1993 (WHA44/1991/REC/1):116.  
10  
11  
12 16. International Union Against Tuberculosis and Lung Disease. Best Practice for the Care of  
13 Patients with Tuberculosis. Paris: USAID 2007:P51.  
14  
15  
16 17. Kruk ME, Schwalbe NR, Aguiar CA. Timing of default from tuberculosis treatment: a  
17 systematic review. *Trop Med Int Health* 2008;**13**:703-12.  
18  
19  
20 18. Caylà JA, Rodrigo T, Ruiz-Manzano J, et al. Working Group on Completion of  
21 Tuberculosis Treatment in Spain (Study ECUTTE). Tuberculosis treatment adherence and  
22 fatality in Spain. *Respir Res* 2009;**10**:121.  
23  
24  
25 19. UNAIDS. “HIV and AIDS-related stigmatisation, discrimination and denial: forms,  
26 contexts and determinants,” research studies from Uganda and India (prepared for UNAIDS  
27 by Peter Aggleton). Geneva:UNAIDS 2000:1-28.  
28  
29  
30 20. USAID. Breaking the cycle: Stigma, Discrimination, Internal stigma, and HIV. POLICY  
31 project (prepared for USAID by Ken Morrison) . Washington, DC: USAID2006:1-17.  
32  
33  
34 21. Bam TS, Gunneberg C, Chamroonsawasdi K, et al. Factors affecting patient adherence to  
35 DOTS in urban Kathmandu, Nepal. *Int J Tuberc Lung Dis* 2006;**10**:270–6.  
36  
37  
38 22. Chang KC, Leung CC, Tam CM. Risk factors for defaulting from antituberculosis  
39 treatment under directly observed treatment in Hong Kong. *Int J Tuberc Lung Dis* 2004;**8**:  
40 1492–98.  
41  
42  
43 23. Gelmanova IY, Keshavjee S, Golubchikova VT, et al. Barriers to successful tuberculosis  
44 treatment in Tomsk, Russian Federation: non-adherence, default and the acquisition of  
45 multidrug resistance. *Bull World Health Organ* 2007;**85**:703–11.  
46  
47  
48 24. Castelnovo B, Hermans S, Park R, et al. Evaluation of the impact of TB-HIV integrated  
49 care in reducing the proportion of patients defaulting anti TB treatment in a large urban HIV  
50 clinic in Kampala, Uganda. [abstract IAS 2011].  
51  
52  
53  
54  
55  
56  
57  
58  
59  
60

1  
2  
3 25. Dalal RP, Macphail C, Mqhayi M, et al. Characteristics and outcomes of adult patients  
4 lost to follow-up at an antiretroviral treatment clinic in johannesburg, South Africa. *J Acquir*  
5 *Immune Defic Syndr* 2008;**47**:101-7.  
6  
7  
8

9  
10 26. Brinkhof MW, Pujades-Rodriguez M, Egger M. Mortality of patients lost to follow-up in  
11 antiretroviral treatment programmes in resource-limited settings: systematic review and meta-  
12 analysis. *PLoS One* 2009;**4**:e5790.  
13  
14  
15  
16  
17  
18  
19  
20  
21  
22  
23  
24  
25  
26  
27  
28  
29  
30  
31  
32  
33  
34  
35  
36  
37  
38  
39  
40  
41  
42  
43  
44  
45  
46  
47  
48  
49  
50  
51  
52  
53  
54  
55  
56  
57  
58  
59  
60

For peer review only



**STROBE 2007 (v4) checklist of items to be included in reports of observational studies in epidemiology\***  
**Checklist for cohort, case-control, and cross-sectional studies (combined)**

| Section/Topic             | Item # | Recommendation                                                                                                                                                                                                                                                                                                                                                                                                                                                         | Reported on page # |
|---------------------------|--------|------------------------------------------------------------------------------------------------------------------------------------------------------------------------------------------------------------------------------------------------------------------------------------------------------------------------------------------------------------------------------------------------------------------------------------------------------------------------|--------------------|
| Title and abstract        | 1      | (a) Indicate the study's design with a commonly used term in the title or the abstract                                                                                                                                                                                                                                                                                                                                                                                 | 1                  |
|                           |        | (b) Provide in the abstract an informative and balanced summary of what was done and what was found                                                                                                                                                                                                                                                                                                                                                                    | 2                  |
| <b>Introduction</b>       |        |                                                                                                                                                                                                                                                                                                                                                                                                                                                                        |                    |
| Background/rationale      | 2      | Explain the scientific background and rationale for the investigation being reported                                                                                                                                                                                                                                                                                                                                                                                   | 4                  |
| Objectives                | 3      | State specific objectives, including any pre-specified hypotheses                                                                                                                                                                                                                                                                                                                                                                                                      | 4                  |
| <b>Methods</b>            |        |                                                                                                                                                                                                                                                                                                                                                                                                                                                                        |                    |
| Study design              | 4      | Present key elements of study design early in the paper                                                                                                                                                                                                                                                                                                                                                                                                                | 4,5                |
| Setting                   | 5      | Describe the setting, locations, and relevant dates, including periods of recruitment, exposure, follow-up, and data collection                                                                                                                                                                                                                                                                                                                                        | 4-6                |
| Participants              | 6      | (a) <i>Cohort study</i> —Give the eligibility criteria, and the sources and methods of selection of participants. Describe methods of follow-up<br><i>Case-control study</i> —Give the eligibility criteria, and the sources and methods of case ascertainment and control selection. Give the rationale for the choice of cases and controls<br><i>Cross-sectional study</i> —Give the eligibility criteria, and the sources and methods of selection of participants | 6,7                |
|                           |        | (b) <i>Cohort study</i> —For matched studies, give matching criteria and number of exposed and unexposed<br><i>Case-control study</i> —For matched studies, give matching criteria and the number of controls per case                                                                                                                                                                                                                                                 | /                  |
| Variables                 | 7      | Clearly define all outcomes, exposures, predictors, potential confounders, and effect modifiers. Give diagnostic criteria, if applicable                                                                                                                                                                                                                                                                                                                               | 6                  |
| Data sources/ measurement | 8*     | For each variable of interest, give sources of data and details of methods of assessment (measurement). Describe comparability of assessment methods if there is more than one group                                                                                                                                                                                                                                                                                   | 7                  |
| Bias                      | 9      | Describe any efforts to address potential sources of bias                                                                                                                                                                                                                                                                                                                                                                                                              | 5,7                |
| Study size                | 10     | Explain how the study size was arrived at                                                                                                                                                                                                                                                                                                                                                                                                                              | 5,7                |
| Quantitative variables    | 11     | Explain how quantitative variables were handled in the analyses. If applicable, describe which groupings were chosen and why                                                                                                                                                                                                                                                                                                                                           | 7                  |
| Statistical methods       | 12     | (a) Describe all statistical methods, including those used to control for confounding                                                                                                                                                                                                                                                                                                                                                                                  | 7,8                |
|                           |        | (b) Describe any methods used to examine subgroups and interactions                                                                                                                                                                                                                                                                                                                                                                                                    | 7,8                |
|                           |        | (c) Explain how missing data were addressed                                                                                                                                                                                                                                                                                                                                                                                                                            | 7,8                |
|                           |        | (d) <i>Cohort study</i> —If applicable, explain how loss to follow-up was addressed<br><i>Case-control study</i> —If applicable, explain how matching of cases and controls was addressed                                                                                                                                                                                                                                                                              | /                  |



|                          |     |                                                                                                                                                                                                              |             |
|--------------------------|-----|--------------------------------------------------------------------------------------------------------------------------------------------------------------------------------------------------------------|-------------|
|                          |     | <i>Cross-sectional study</i> —If applicable, describe analytical methods taking account of sampling strategy                                                                                                 |             |
|                          |     | (e) Describe any sensitivity analyses                                                                                                                                                                        |             |
| <b>Results</b>           |     |                                                                                                                                                                                                              |             |
| Participants             | 13* | (a) Report numbers of individuals at each stage of study—eg numbers potentially eligible, examined for eligibility, confirmed eligible, included in the study, completing follow-up, and analysed            | 8           |
|                          |     | (b) Give reasons for non-participation at each stage                                                                                                                                                         | 8           |
|                          |     | (c) Consider use of a flow diagram                                                                                                                                                                           | /           |
| Descriptive data         | 14* | (a) Give characteristics of study participants (eg demographic, clinical, social) and information on exposures and potential confounders                                                                     | 8           |
|                          |     | (b) Indicate number of participants with missing data for each variable of interest                                                                                                                          | 9           |
|                          |     | (c) <i>Cohort study</i> —Summarise follow-up time (eg, average and total amount)                                                                                                                             | 9           |
| Outcome data             | 15* | <i>Cohort study</i> —Report numbers of outcome events or summary measures over time                                                                                                                          | 9           |
|                          |     | <i>Case-control study</i> —Report numbers in each exposure category, or summary measures of exposure                                                                                                         |             |
|                          |     | <i>Cross-sectional study</i> —Report numbers of outcome events or summary measures                                                                                                                           |             |
| Main results             | 16  | (a) Give unadjusted estimates and, if applicable, confounder-adjusted estimates and their precision (eg, 95% confidence interval). Make clear which confounders were adjusted for and why they were included | 9,10,11     |
|                          |     | (b) Report category boundaries when continuous variables were categorized                                                                                                                                    | 9           |
|                          |     | (c) If relevant, consider translating estimates of relative risk into absolute risk for a meaningful time period                                                                                             |             |
| Other analyses           | 17  | Report other analyses done—eg analyses of subgroups and interactions, and sensitivity analyses                                                                                                               | 10          |
| <b>Discussion</b>        |     |                                                                                                                                                                                                              |             |
| Key results              | 18  | Summarise key results with reference to study objectives                                                                                                                                                     | 11,12       |
| Limitations              | 19  | Discuss limitations of the study, taking into account sources of potential bias or imprecision. Discuss both direction and magnitude of any potential bias                                                   | 13          |
| Interpretation           | 20  | Give a cautious overall interpretation of results considering objectives, limitations, multiplicity of analyses, results from similar studies, and other relevant evidence                                   | 11,12,13,14 |
| Generalisability         | 21  | Discuss the generalisability (external validity) of the study results                                                                                                                                        | 13,14       |
| <b>Other information</b> |     |                                                                                                                                                                                                              |             |
| Funding                  | 22  | Give the source of funding and the role of the funders for the present study and, if applicable, for the original study on which the present article is based                                                | 14          |

\*Give information separately for cases and controls in case-control studies and, if applicable, for exposed and unexposed groups in cohort and cross-sectional studies.

**Note:** An Explanation and Elaboration article discusses each checklist item and gives methodological background and published examples of transparent reporting. The STROBE checklist is best used in conjunction with this article (freely available on the Web sites of PLoS Medicine at <http://www.plosmedicine.org/>, Annals of Internal Medicine at <http://www.annals.org/>, and Epidemiology at <http://www.epidem.com/>). Information on the STROBE Initiative is available at [www.strobe-statement.org](http://www.strobe-statement.org).

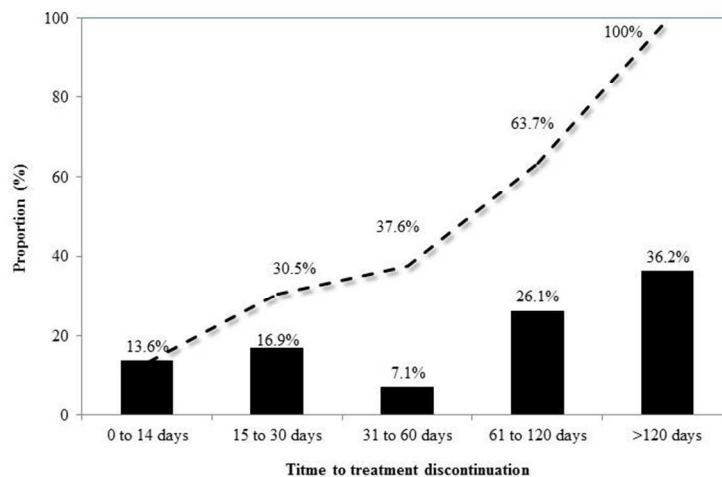

Figure 1 - Time to antituberculosis treatment discontinuation in 337 defaulters at the Yaounde Jamot Hospital in 2009

The vertical bars are proportional to the number of participants who stopped their treatment within the indicated time frame. The dotted superimposed curve is for the cumulative number of defaulter across time. Within each time frame, the frame specific proportion of defaulters is shown, together with the cumulative proportion of defaulters up to that time limit.

254x190mm (96 x 96 DPI)

only

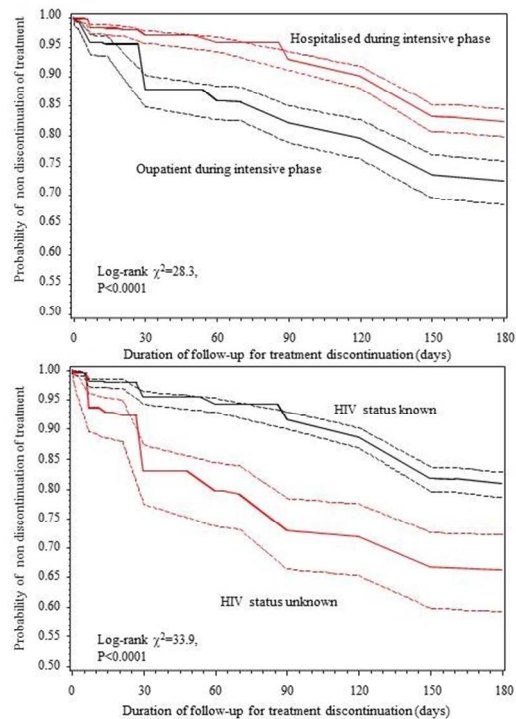

Figure 2 – Kaplan-Meier curves showing the probability of dropping out in subgroups defined by the setting of intensive treatment (upper panel) and knowledge of the status for HIV (lower panel) For each figure panel, the log-rank test results comparing the probability between subgroups are also shown.

254x190mm (96 x 96 DPI)

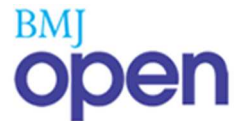

**Incidence, time and determinants of tuberculosis treatment default in Yaounde, Cameroon: a retrospective hospital register-based cohort study**

|                                 |                                                                                                                                                                                                                                                                                                                                                                                                                                                          |
|---------------------------------|----------------------------------------------------------------------------------------------------------------------------------------------------------------------------------------------------------------------------------------------------------------------------------------------------------------------------------------------------------------------------------------------------------------------------------------------------------|
| Journal:                        | <i>BMJ Open</i>                                                                                                                                                                                                                                                                                                                                                                                                                                          |
| Manuscript ID:                  | bmjopen-2011-000289.R2                                                                                                                                                                                                                                                                                                                                                                                                                                   |
| Article Type:                   | Research                                                                                                                                                                                                                                                                                                                                                                                                                                                 |
| Date Submitted by the Author:   | 28-Oct-2011                                                                                                                                                                                                                                                                                                                                                                                                                                              |
| Complete List of Authors:       | Pefura Yone, Eric Walter; Yaounde Jamot's Hospital; Faculty of Medicine and Biomedical Sciences, The University of Yaounde I, Department of Internal Medicine and specialties<br>Kengne, Andre; South African Medical research Council & University of Cape Town<br>Kuaban, Christopher; Yaounde Jamot's Hospital, Chest Unit; Faculty of Medicine and Biomedical Sciences, The University of Yaounde I, Department of Internal Medicine and specialties |
| <b>Primary Subject Heading</b>: | Infectious diseases                                                                                                                                                                                                                                                                                                                                                                                                                                      |
| Secondary Subject Heading:      | Respiratory medicine, Public health                                                                                                                                                                                                                                                                                                                                                                                                                      |
| Keywords:                       | Tuberculosis < INFECTIOUS DISEASES, PUBLIC HEALTH, Thoracic medicine < INTERNAL MEDICINE                                                                                                                                                                                                                                                                                                                                                                 |
|                                 |                                                                                                                                                                                                                                                                                                                                                                                                                                                          |

SCHOLARONE™  
Manuscripts

Only

1  
2  
3 **Incidence, time and determinants of tuberculosis treatment default in Yaounde,**  
4 **Cameroon: a retrospective hospital register-based cohort study**  
5

6 Short title: **Tuberculosis treatment default**  
7

8 Eric Walter PEFURA YONE (1, 2), André Pascal KENGNE (3), Christopher KUABAN (1,  
9 2)  
10

11  
12 1) Department of Internal Medicine and specialties, Faculty of Medicine and Biomedical  
13 Sciences, The University of Yaounde I, Cameroon  
14

15  
16 2) Chest unit, Yaounde Jamot's Hospital, Yaounde, Cameroon  
17

18  
19 3) South African Medical research Council & University of Cape Town, South Africa  
20  
21  
22  
23

24 **Correspondence to:**  
25

26 Dr Eric Walter PEFURA YONE,  
27

28 Yaounde Jamot's Hospital,  
29

30 PO Box 4021-Yaounde, Cameroon  
31

32 Tel: (237)96539726, Fax: (237)22203165,  
33

34 Email: pefura2002@yahoo.fr  
35  
36  
37  
38

39 **Tables: 2**

40  
41 **Figures: 2**  
42

43 **Online only material: 0**  
44

45 **Word count:** abstract-289; Main text (excluding tables, figures, abstract & references)-3,073  
46

47 **References: 26**  
48  
49  
50  
51  
52  
53  
54  
55  
56  
57  
58  
59  
60

## Abstract

Objectives: High rates of antituberculosis treatment discontinuation have been reported in places in Africa. The aim of this study was to determine the rate, time to- and determinants of antituberculosis treatment default in Yaounde.

Design: This was a retrospective cohort study based on hospital registers. Tuberculosis treatment default or antituberculosis treatment discontinuation was defined as any interruption of treatment for at least 2 months, following treatment initiation. Sociodemographic and clinical predictors of treatment discontinuation were investigated with the use of Cox regressions models.

Setting: This study was carried out to the Yaounde Jamot's referral tuberculosis diagnosis and treatment centre. The Yaounde Jamot Hospital serves a referral centre for tuberculosis and respiratory diseases for the capital city of Cameroon (Yaounde) and surrounding areas.

Participants: All (1688) patients started on antituberculosis treatment at the centre between January and December 2009.

Outcome measures: Antituberculosis treatment default, time to treatment default.

Results: Of the 1688 patients included, 337 (20%) defaulted from treatment, 86 (5.1%) died, treatment failed in 6 (0.4%) and 104 (6.2%) were transferred. Therefore, treatment was successfully completed in 1154 (68.4%) patients. Median duration to treatment discontinuation was 90 days (interquartile range: 30-150), and 62% of treatment discontinuation occurred during continuation phase. Hospitalisation during intensive phase [adjusted hazard ratio 0.69 (95% confidence interval: 0.54-0.89)] and non-consenting for HIV screening [1.65 (1.24-2.21)] were the main determinants of defaulting from treatment in multivariable analysis.

Conclusions: The default incidence rate is relatively high in this centre and treatment discontinuation occurs frequently during the continuation phase of the treatment. Actions are needed to improve adherence to treatment when taken on an ambulatory basis, clarify the association between HIV testing and defaulting to antituberculosis treatment, and identify other potential determinants of treatment discontinuation in this setting.

Word count – 289

Key words – tuberculosis, default, antituberculosis, treatment discontinuation, Cameroon

1  
2  
3 **Article focus:** What are the rates, time to- and determinants of antituberculosis treatment  
4 discontinuation in the era of directly observed treatment in sub-Saharan Africa, using the case  
5 of Cameroon for illustration?  
6  
7  
8

9  
10 **Key messages:** Antituberculosis treatment success rates remain non-optimal in sub-Saharan  
11 Africa where the highest global incidence rates for tuberculosis are found. Treatment  
12 discontinuation is one of the main reasons, but has been less explored in Africa in recent  
13 times.  
14  
15  
16  
17

18  
19  
20 Knowledge of determinants of antituberculosis treatment discontinuation is critical for  
21 informing health service and policy solutions needed to improve the outcomes of care for  
22 tuberculosis and contain the spread of the disease.  
23  
24  
25

26  
27 **Strengths:** Large cohort study with up to 1688 participants.  
28  
29

30 **Limitations:** retrospective study with lack of some key information.  
31  
32  
33  
34  
35  
36  
37  
38  
39  
40  
41  
42  
43  
44  
45  
46  
47  
48  
49  
50  
51  
52  
53  
54  
55  
56  
57  
58  
59  
60

## INTRODUCTION

Tuberculosis is highly endemic in the majority of sub-Saharan African (SSA) countries where highest global annual incidence rates are recorded.[1] The expected therapeutic success target of 85% among newly diagnosed individuals with positive smear is largely unachieved in many settings in SSA.[1] Defaulting from tuberculous treatment is one of the reasons for this non-optimal performance. Tuberculosis treatment default or antituberculosis treatment (ATT) discontinuation is defined as any interruption of antituberculosis treatment for at least 2 months, following treatment initiation.[2,3] Antituberculosis treatment discontinuation is associated with disease reoccurrence following treatment, increased mortality, maintenance of micro-organisms reservoirs and emergence drug-resistant species of mycobacterium.[4]

The directly observed treatment (DOT) strategy has been recommended by the World Health Organisation (WHO),[5] for improving the outcome of care for tuberculosis. Implementation of the DOT strategy started in Cameroon in the mid 90's and was expanded to the entire country in the years 2000. Despite this, available evidence suggests that antituberculosis treatment discontinuation has remained relatively high.[6] Many factors have been linked with antituberculosis treatment discontinuation in SSA including infrequent bacilloscopic monitoring, transfer of patients across health services units, lack of family support, side effects of medications, health care systems factors and patient misinformation.[7-9] In general, studies on the determinants of antituberculosis treatment discontinuation in Africa and in Cameroon are mostly out-dated and less reflective of the DOT and highly active anti-retroviral therapy (HAART) eras, and the few relevant studies are heterogeneous. [7, 8] In addition, none of the relevant study has been conducted in Cameroon after DOT implementation in this country. In this context therefore, updated information are needed on antituberculosis treatment discontinuation and determinants that reflects both the DOT era and recent improvements in the access to HIV testing and treatment, in order to guide further improvement in the outcomes of care for tuberculosis.

The aim of the current study was to assess the incidence rate, determinants and time to antituberculosis treatment discontinuation in the real-life settings of a historical diagnosis and treatment centre for tuberculosis in Yaounde, Cameroon.

## METHODS

### Study setting



1  
2  
3 The study was conducted in the pneumology service of Yaounde Jamot Hospital (YJH). The  
4 Yaounde Jamot Hospital serves a referral centre for tuberculosis and respiratory diseases for  
5 the capital city of Cameroon (Yaounde) and surrounding areas. It is one of the major centres  
6 for diagnosis and treatment of tuberculosis (CDT) in Cameroon. The pneumology service of  
7 Yaounde Jamot Hospital is a 257 bedded service and 11% of all cases of tuberculosis  
8 diagnosed in Cameroon in 2009 were managed in this service. Since five years, about 1600 to  
9 1800 patients with tuberculosis are diagnosed and treated by the Centre for Diagnosis and  
10 Treatment of tuberculosis. The Yaounde Jamot Hospital also hosts an approved treatment  
11 centre (ATC) that provides care to people living with Human Immunodeficiency Virus (HIV)  
12 infection. Patients received at the Diagnosis and Treatment Centre of tuberculosis during  
13 January to December 2009 were considered for inclusion in the study. The study was  
14 approved by the administrative authorities of the Yaounde Jamot Hospital.

### 23 **Definition and classification of tuberculosis cases**

24 Patients who receive care at the Centre for Diagnosis and Treatment of tuberculosis of  
25 Yaounde Jamot Hospital are consecutively registered as they are started on treatment. For  
26 patients with a past exposure to antituberculosis treatment, the approach is nearly similar.  
27 Those patients who report back to the centre with active tuberculosis and who have been  
28 treated in the past for at least one month are registered again with a new number and started  
29 on a standardised re-treatment regimen. The following international definitions are applied:  
30 [2, 3, 5] 1) smear-positive pulmonary tuberculosis (PTB+) - acid-fast bacillary (AFB) found  
31 in at least two sputum specimens; 2) smear-negative pulmonary tuberculosis (PTB-) –  
32 persisting negativity on three sputum examinations after ten-day course of non-specific  
33 antibiotic treatment in a patient with tuberculosis-like clinical and radiological signs, and in  
34 the absence of any obvious cause; 3) extra-pulmonary tuberculosis – tuberculosis involving  
35 organs other than the lungs. Patients with past exposure to antituberculosis treatment are  
36 usually smear-positive [2] and are further classified as “relapse” (i.e. reoccurrence of the  
37 disease following a successful antituberculosis treatment course), “failure” (i.e. positive smear  
38 after five months of antituberculosis treatment) and “treatment after default” (i.e. starting  
39 tuberculosis treatment again after two consecutive months of interruption). A “new case” is a  
40 patient with tuberculosis who has never been exposed to antituberculosis treatment for more  
41 than one month in the past. “Other cases of tuberculosis” refers to patients who cannot fit in  
42 one of the categories described above (i.e. patient relapsing for a second time for tuberculosis,  
43  
44  
45  
46  
47  
48  
49  
50  
51  
52  
53  
54  
55  
56  
57  
58  
59  
60

1  
2  
3 with involved mycobacterium being sensitive to antituberculosis, and treated for 6 months  
4 with standard regimens).

### 5 6 7 **Detection and management of HIV infection**

8  
9 At the Centre for Diagnosis and Treatment of tuberculosis of the Yaounde Jamot Hospital, all  
10 patients with tuberculosis are screened for HIV infection free of charge after informed consent  
11 has been obtained from the patient or relative for dependant patients. This includes detection  
12 of anti-HIV 1 and anti-HIV 2 antibodies in the serum with the use of two rapid tests:  
13 Determine® HIV 1/2 (Abbot laboratories, Tokyo, Japan) and Immunocomb® II HIV 1 and 2  
14 Bispot (Organics, Courbevoie, France). A patient is classified as HIV positive when the two  
15 tests are positive. For discordant tests, a confirmatory western blot test (New Lav Blot, Sanofi  
16 diagnostics-Pasteur) is conducted. All HIV-positive patients are started on prophylaxis with  
17 cotrimoxazole and those with CD4 lymphocytes count  $<200/\text{mm}^3$  (or  $<15\%$  of the total  
18 lymphocyte count in those  $<15$  years of age) are started on triple antiretroviral therapy free of  
19 charge. Initial antiretroviral regimens are the combinations lamivudine-zidovudine-efavirenz  
20 or lamivudine-stavudine-efavirenz.  
21  
22  
23  
24  
25  
26  
27  
28

### 29 **Tuberculosis treatment**

30  
31 Tuberculosis treatment at the Centre for Diagnosis and Treatment of tuberculosis is based on  
32 the DOT approach, in accordance with the guidelines of the Cameroon National Programme  
33 Against Tuberculosis (NPAT) and the WHO recommendations.[2, 3] Patients are either  
34 admitted during the intensive phase (IP) of antituberculosis treatment, or treated as outpatient.  
35 Antituberculosis drugs are dispensed free of charge to all patients. Treatment regimens used  
36 are standard regimens of category I for new patients and of category II for re-treatment cases.  
37 New cases are treated with a regimen that includes an intensive phase of two months duration  
38 with rifampicin (R), isoniazid (H), ethambutol (E) and pyrazinamide (Z), followed by a 4-  
39 month continuation phase with rifampicin and isoniazid. During re-treatment, category I  
40 medications (R, H, E, Z) are completed with streptomycin (S). Therefore, re-treatment cases  
41 are treated with RHEZS for two months, followed by one month on RHEZ and five months  
42 on RHE. During the intensive phase, adherence is directly monitored by the healthcare team  
43 for patients admitted, and during weekly drug collection in those treated as outpatients. The  
44 continuation phase is conducted on the outpatient basis and adherence assessed during  
45 monthly drugs collection visits.  
46  
47  
48  
49  
50  
51  
52  
53  
54  
55

### 56 **Monitoring and outcomes of tuberculosis treatment**

1  
2  
3 During antituberculosis treatment, PTB+ patients are re-examined for AFB at the end of  
4 month 2, 5 and 6 for new cases, and at the end of month 3, 5 and 8 in case of re-treatment.  
5  
6 PTB- and patients with extra-pulmonary tuberculosis are monitored clinically and/or  
7 radiologically at the same frequency. At the end of the treatment, patients are ranked into  
8 mutually exclusive categories as:[2] 1) cured – patient with negative smear at the last month  
9 of treatment and at least one of the preceding; 2) treatment completed – patient who has  
10 completed the treatment and for whom the smear result at the end of the last month is not  
11 available; 3) failure – patient with at least two positive smear at the 5<sup>th</sup> month or later during  
12 treatment; 4) death – death from any cause during treatment; 5) defaulter – patient who's  
13 treatment has been interrupted for at least two consecutive months; 6) transfer – patient  
14 transferred to complete his treatment in another centre and who's treatment outcome is  
15 unknown.  
16  
17  
18  
19  
20  
21  
22

### 23 **Data collection**

24  
25 Tuberculosis treatment registers and antituberculosis treatment forms of the YJH's Centre for  
26 Diagnosis and Treatment of tuberculosis served as basis for data collection for the study. Data  
27 were collected on age, sex, residence (urban vs. rural), history of exposure to antituberculosis  
28 treatment, localisation of tuberculosis infection, status for HIV infection, CD4 lymphocyte  
29 count (in those with HIV infection), intensive antituberculosis treatment setting (hospital vs.  
30 ambulatory), outcome of tuberculosis treatment and time to treatment discontinuation. Cured  
31 and tuberculosis treatment completion were considered as favourable outcome (successful  
32 treatment) while death, default and failure were considered as unfavourable outcome.[10]  
33  
34  
35  
36  
37  
38

### 39 **Statistical methods**

40  
41 Data analysis used SPSS® v.12.0.1 for Windows® (SPSS Inc., Chicago, USA) and  
42 SAS/STAT® v 9.1 for windows (SAS Institute Inc., Cary, NC, USA). Results are presented  
43 as count (proportions) and median (interquartile range, IQR). Group comparisons used chi  
44 square test and equivalents for qualitative variables, and analysis of the variance (ANOVA)  
45 and equivalents for quantitative variables. Cox proportional hazard regression models were  
46 used to relate baseline characteristics with treatment discontinuation during follow-up.  
47 Exploratory analyses were adjusted for age and sex; then all significant predictors identified  
48 ( $p < 0.05$ ) were entered into the same multivariable model adjusted for sex and age. All Cox  
49 models were stratified by type of patients (i.e. new patient, retreatment) to account for  
50 differences in the duration of treatment. Kaplan-Meier estimator was also used to depict the  
51  
52  
53  
54  
55  
56  
57  
58  
59  
60

1  
2  
3 probability of treatment discontinuation across strata of significant predictors and group  
4 comparisons made with the use of the log-rank test. A p-value<0.05 was used to characterise  
5 statistically significant results.  
6  
7

## 8 9 **RESULTS**

### 10 **Study population and antituberculosis treatment discontinuation rate**

11  
12 Between January and December 2009, 1688 patients with tuberculosis were registered at the  
13 Centre for Diagnosis and Treatment of tuberculosis. Their demographic, clinical profile and  
14 outcomes are summarised in Table 1. They were aged 32 years (interquartile range: 25-42  
15 years) and 954 (56.5%) were men. Clinical forms of tuberculosis were: 1231 (73%) for PTB+,  
16 168 (10%) for PTB- and 289 (17%) for EPTB. The cumulative incidence rate of  
17 antituberculosis treatment discontinuation was 20% and the treatment success rate was 68.4%.  
18  
19  
20  
21  
22  
23  
24  
25  
26  
27  
28  
29  
30  
31  
32  
33  
34  
35  
36  
37  
38  
39  
40  
41  
42  
43  
44  
45  
46  
47  
48  
49  
50  
51  
52  
53  
54  
55  
56  
57  
58  
59  
60

**Table 1: Characteristics of patients with tuberculosis according to the treatment outcome at the Yaounde Jamot Hospital in 2009**

| Characteristics                         | Categories        | Total            | Outcomes of tuberculosis treatment |            |            |            |              | P-value |
|-----------------------------------------|-------------------|------------------|------------------------------------|------------|------------|------------|--------------|---------|
|                                         |                   |                  | Treatment success*                 | Failure    | Deaths     | Defaulted  | Transferred  |         |
| N(%)                                    |                   | 1688             | 1155 (68.4)                        | 6 (0.4)    | 86 (5.1)   | 337 (20.0) | 104 (6.2)    |         |
| Age, years                              | ≤15               | 39 (2.3)         | 33 (84.6)                          | 0 (0)      | 0 (0)      | 5 (12.8)   | 1 (2.6)      | <0.031  |
|                                         | >15-59            | 1554 (92.1)      | 1067 (68.7)                        | 5 (0.3)    | 75 (4.8)   | 310 (19.9) | 97 (6.2)     |         |
|                                         | ≥ 60              | 95 (5.6)         | 55 (57.9)                          | 1 (1.1)    | 11(11.6)   | 22 (23.2)  | 6 (6.3)      |         |
|                                         | Median (IQR)      | 32 (25-42)       | 32 (24-42)                         | 35 (26-48) | 45 (32-54) | 32 (25-42) | 35.5 (24-42) | <0.001  |
| Men                                     |                   | 954 (56.5)       | 650 (68.1)                         | 4 (0.4)    | 50 (5.2)   | 195 (20.4) | 55 (5.8)     | 0.882   |
| Residence                               | Urban             | 1423/1662 (85.6) | 995 (69.9)                         | 5 (0.4)    | 72 (5.1)   | 283 (19.9) | 68 (4.8)     | <0.001  |
|                                         | Rural             | 239/1662 (14.4)  | 144 (60.3)                         | 1 (0.4)    | 13 (5.4)   | 47 (19.7)  | 34 (14.2)    |         |
| Place of screening                      | This centre       | 1625 (96.3)      | 1115 (68.6)                        | 6 (0.4)    | 84 (5.2)   | 319 (19.6) | 101 (6.2)    | 0.269   |
|                                         | Elsewhere         | 63 (3.7)         | 40 (63.5)                          | 0 (0)      | 2 (3.2)    | 18 (28.6)  | 3 (4.8)      |         |
| Setting of intensive phase of treatment | Hospitalisation   | 1098 (65.0)      | 772 (70.3)                         | 3 (0.3)    | 69 (6.3)   | 179 (16.3) | 75 (6.8)     | <0.001  |
|                                         | Outpatient        | 590 (35.0)       | 383 (64.9)                         | 3 (0.5)    | 17 (2.9)   | 158 (26.8) | 29 (4.9)     |         |
| Clinical forms                          | PTB+              | 1231 (72.9)      | 860 (69.9)                         | 6 (0.5)    | 16 (4.5)   | 239 (19.4) | 70 (5.7)     | 0.012   |
|                                         | PTB-              | 168 (10.0)       | 95 (56.5)                          | 0 (0)      | 16 (9.5)   | 45 (26.8)  | 12 (7.1)     |         |
|                                         | ETB               | 289 (17.1)       | 200 (69.2)                         | 0 (0)      | 14 (4.8)   | 53 (18.3)  | 22 (7.6)     |         |
| Type of patient                         | New cases         | 1543 (91.4)      | 1059 (68.6)                        | 5 (0.3)    | 81 (5.2)   | 299 (19.4) | 99 (6.4)     | 0.20    |
|                                         | Retreatment cases | 145 (8.6)        | 96 (66.2)                          | 1 (0.7)    | 5 (3.4)    | 38 (26.2)  | 5 (3.4)      |         |
| HIV serology                            | Not done          | 241 (14.3)       | 122 (50.6)                         | 2 (0.8)    | 20 (8.3)   | 72 (29.9)  | 25 (10.4)    | <0.001  |
|                                         | Negative          | 942 (55.8)       | 703 (74.6)                         | 4 (0.4)    | 17 (1.8)   | 166 (18)   | 50 (5.4)     |         |
|                                         | Positive          | 497/1419 (35)    | 330 (65.3)                         | 0 (0)      | 49 (9.7)   | 97 (19.2)  | 29 (5.7)     |         |
| Sputum smear conversion £               | Yes               | 1378/1471 (93.7) | 1072 (77.8)                        | 0 (0)      | 13 (0.9)   | 229 (16.6) | 64 (4.6)     | <0.001  |
|                                         | No                | 93/1471 (6.3)    | 82.8)                              | 4 (4.3)    | 0 (0)      | 10 (10.8)  | 2 (2.2)      |         |

Data are number (%) unless otherwise indicated; IQR, interquartile range; ETB, extra-pulmonary tuberculosis; PTB+, smear positive pulmonary tuberculosis; PTB-, smear negative pulmonary tuberculosis; \*treatment success = cured+completed; £ at the end of intensive phase (applicable only to patients with smear positive tuberculosis)

### Time to tuberculosis treatment discontinuation

Antituberculosis treatment interruption in 210 patients (62.3%) occurred during continuation phase of treatment (Figure 1) and the median (IQR) duration to tuberculosis treatment discontinuation was 90 days (30-150). Tuberculosis treatment discontinuation was more likely to occur during continuation phase in those hospitalised during intensive phase than in those treated as outpatients [134 (74.9%) vs. 77 (48.7%),  $p < 0.0001$ ].

### Determinants of treatment discontinuation

The probability of treatment discontinuation according to setting for intensive treatment and whether HIV test was done is depicted in Figure 2. At each time point during follow-up the probability of treatment discontinuation was always lower in patients hospitalized during intensive treatment phase than in those treated as outpatients during intensive phase. Similarly, discontinuation probability was always lower in patients with known status for HIV infection than in those with unknown status.

Cox regression models were used to examine predictors of treatment discontinuation using the observed follow-up duration for all participants in the overall cohort. In models adjusted for age and sex, hospitalisation during intensive phase reduced the risk of treatment discontinuation [hazard ratio (HR) 0.58, 95% confidence interval (95% CI): 0.46-0.72], while having PTB- [1.59 (1.15-2.21)] or unknown status for HIV infection [1.28 (1.17-1.41)] significantly increased the risk of treatment discontinuation. With further adjustment for those variables that were significant in basic models, ambulatory treatment during intensive phase and unknown status for HIV infection were the main determinants of antituberculosis treatment discontinuation (Table 2).

**Table 2: Hazard ratio (HR) and 95% confidence interval (95% CI) for predictors of antituberculosis treatment discontinuation from Cox regression analysis**

| Characteristics                      | Basic models     |         | Final models     |        |
|--------------------------------------|------------------|---------|------------------|--------|
|                                      | HR (95% CI)      | p       | HR (95%CI)       | p      |
| <b>Age (per year)</b>                | 1.01 (1.00-1.01) | 0.121   | 1.01 (1.00-1.01) | 0.133  |
| <b>Sex (women vs. men)</b>           | 0.96 (0.77-1.20) | 0.723   | 0.99(0.79-1.23)  | 0.922  |
| <b>Hospitalised intensive phase</b>  | 0.58 (0.46-0.72) | <0.0001 | 0.69 (0.54-0.89) | 0.004  |
| <b>Residence (urban vs. rural)</b>   | 0.92(0.67-1.26)  | 0.596   | /                | /      |
| <b>Clinical form of tuberculosis</b> |                  |         |                  |        |
| <b>Positive smear (Reference)</b>    | 1.00 (reference) |         | 1.00 (reference) |        |
| <b>Negative smear</b>                | 1.59( 1.15-2.21) | 0.005   | 1.25 (0.89-1.76) | 0.192  |
| <b>Extra-pulmonary</b>               | 0.99(0.73-1.34)  | 0.948   | 0.96(0.71-1.30)  | 0.780  |
| <b>Unknown status for HIV</b>        | 1.28 (1.17-1.41) | <0.0001 | 1.65 (1.24-2.21) | 0.0007 |

HIV, Human Immunodeficiency Virus; Basic models are adjusted for age and sex; and final models further adjust for all significant predictors in basic models. All Cox models are stratified by type of patients (i.e. new patient, retreatment) to account for difference in the duration of treatment.

## DISCUSSION

In this study, we have assessed the incidence of antituberculosis treatment discontinuation and predictors of treatment discontinuation in a large cohort of patients treated for tuberculosis in a major referral centre in Cameroon. Treatment success rate was 68.4% and the cumulative incidence of treatment discontinuation was 20% overall and 19.4% among patients with smear-positive pulmonary tuberculosis. Discontinuation was most likely to occur during continuation phase of treatment and mostly among those treated as outpatients during intensive phase and patients with unknown status for HIV infection.



1  
2  
3 Treatment discontinuation in our study was based on the World Health Organisation's  
4 definition, which refers to a defaulter as a patient who's treatment has been discontinued for  
5 at least two consecutive months.[2] Compared with other few studies from Africa that have  
6 used similar definition, discontinuation rate in our cohort was similar to that reported by  
7 Shargie and co-workers in South Ethiopia, [11] lower than the rate found by Kaona and his  
8 colleagues in Zambia,[12] and higher than the rate by Tekle et al in Arsi in Ethiopia.[13] The  
9 above studies however differs from our study in a number of respects. The largest of those  
10 studies had 20% fewer patients than our cohort,[13] while the two others had less than ¼ the  
11 number of participants in our sample. [11, 12]. Furthermore, the two studies in Ethiopia  
12 involved only rural participants, with one based only on patients with smear-positive  
13 tuberculosis,[13], while the study in Zambia was based on a cross-sectional sample of urban  
14 dwellers.[12] In general, it has been recognised that using a stricter definition for treatment  
15 discontinuation results in much higher rates than when using the World Health Organisation's  
16 definition.[7]

17  
18 Before the reorganisation of the fight against tuberculosis in Cameroon and roll out of the  
19 DOT strategy, antituberculosis treatment discontinuation rate was 31.7% among adults with  
20 PTB+ in the Yaounde Jamot Hospital.[14] Our study would tend to suggest that  
21 implementation of the DOT strategy has positively impacted on antituberculosis treatment  
22 discontinuation, with a 12% drop, although much efforts are still needed to bring the rate  
23 below 10%. The currently observed discontinuation rates are twice higher than the expected  
24 <10%, a requirement if the 85% antituberculosis treatment success rates prescribed in the  
25 millennium development goals are to be achieved.[15] Treatment discontinuation is a major  
26 challenge to programmes against tuberculosis, in the sense that non-adherence to  
27 antituberculosis treatment is associated with reoccurrence of the disease, preservation of  
28 reservoirs for micro-organism dissemination, emergence of drug resistant species of  
29 mycobacterium and increased tuberculosis related deaths.[16]

30  
31 Two out of three patients who defaulted to treatment in our study did so during the  
32 continuation phase of tuberculosis treatment. Predominantly late antituberculosis treatment  
33 discontinuation (i.e. after the intensive phase) has also been confirmed in a systematic  
34 review.[17] This late discontinuation could partly be explained by the improved condition of  
35 the patient following the intensive phase of antituberculosis treatment. It is possible that  
36 patients who feel clinically better following this phase are less motivated to continue the  
37 treatment as they don't feel the need to do so.[16]



1  
2  
3  
4  
5  
6  
7  
8  
9  
10  
11  
12  
13  
14  
15  
16  
17  
18  
19  
20  
21  
22  
23  
24  
25  
26  
27  
28  
29  
30  
31  
32  
33  
34  
35  
36  
37  
38  
39  
40  
41  
42  
43  
44  
45  
46  
47  
48  
49  
50  
51  
52  
53  
54  
55  
56  
57  
58  
59  
60

Tuberculosis treatment on the outpatient basis during the intensive phase and unknown status for HIV were the main determinants of treatment discontinuation found in our study. This would tend to suggest that direct daily supervision reduces the risk of drop out. This could be explained at least in part by the fact that those who receive antituberculosis treatment as inpatient during intensive phase also receive more education on the disease, the duration and outcome of care and are therefore more motivated to observe the treatment for the required duration. Two studies from **Zambia and Ethiopia** have reported that poor knowledge of antituberculosis treatment duration among patients was associated with high risk of treatment discontinuation.[12,13] Unlike our results however, another study in Spain found no protective effect of DOT on antituberculosis treatment discontinuation.[18] Patients with unknown status for HIV in our study are more likely to be those who did not consent for the test, since cost is not a constraint for HIV screening in our setting. It is possible that faced with the persisting invitation from healthcare personnel to accept HIV screening, some of the non-consenting patient would prefer to stop the antituberculosis treatment and walk away from the programme. The stigmatisation of people living with HIV is a reason for not-consenting for screening.[19,20] We can also speculate that antituberculosis treatment discontinuation is not the direct consequence of not-consenting for HIV screening, but the latter is just an indicator of the profile of those patients who will adhere less to any medical prescription. The effects of non-consenting for HIV screening on antituberculosis treatment discontinuation have not been investigated by other studies.[7] In agreement with a previous study in Cameroon,[14] and unlike findings from elsewhere,[11] age, gender and living and rural area were not associated with antituberculosis treatment discontinuation in our study.

This study used administrative data routinely collected for the monitoring of the national programme against tuberculosis. Because such data collection is not comprehensive, we were unable to investigate the effects of some potential determinants of antituberculosis treatment discontinuation such as patient's knowledge about tuberculosis, distance from Centre for Diagnosis and Treatment of tuberculosis to patient's residence, side effects of antituberculosis treatment and chronic alcohol abuse.[8, 9, 21-23] That no systematic effort was in place to trace patients who interrupted their treatment during the year of the study has probably introduced some biases in our ranking of patients according to the outcome of care. For instance, some patients who died in-between drugs collection visit would have been inappropriately classified as defaulters, particularly among HIV infected patients [24-26]. Our

1  
2  
3 study also has major strengths including the large population and inclusion of common forms  
4 of tuberculosis in this setting. Unlike recent studies on this topic in Africa, assessment of  
5 predictors of treatment discontinuation used robust methods to account both for the observed  
6 time to treatment discontinuation as well as differences in the duration of treatment for  
7 various forms of tuberculosis.[7] Those studies have either been based in patients with HIV  
8 and tuberculosis, or lacked information on status for HIV. Accordingly, none has investigated  
9 the effects of HIV testing on the outcome of care for tuberculosis; what our study has  
10 successfully done.

11  
12 In conclusion, antituberculosis treatment discontinuation in this setting is relatively high, and  
13 tends to occur more during the continuation phase of the treatment. Patients who receive  
14 treatment on the outpatient basis during the intensive phase and those who do not consent for  
15 HIV screening are more likely to be those who will interrupt their antituberculosis treatment.  
16 Specific actions targeting these subgroups would likely improve the outcomes of care for  
17 tuberculosis in this centre. That patients treated entirely on ambulatory basis were less like to  
18 achieve good outcomes of care as compared to those hospitalised during intensive treatment  
19 phase, together with much higher discontinuation rates in the same setting in the pre-DOT era,  
20 all suggest that DOT strategy is associated with improved outcomes of care for tuberculosis in  
21 this setting. Prospective studies are needed to investigate other determinants of  
22 antituberculosis treatment discontinuation and refine the incidence data based on a more  
23 objective ascertainment of the outcomes of care.  
24  
25  
26  
27  
28  
29  
30  
31  
32  
33  
34  
35  
36  
37

38 **Competing interests** – None for all authors

39 **Source of funding** – None

40  
41 **Authors' contribution** – EWPY conceived the study, supervised data collection, co-analysed  
42 the data and drafted of the manuscript; APK contributed to study designed, data analysis,  
43 drafting and critical revision of the manuscript; CK supervised the data collection and  
44 critically revised the manuscript. **All authors approved the final version of the manuscript.**  
45  
46  
47  
48

## 49 REFERENCES

50  
51  
52  
53 1. WHO. Tuberculosis profile, Cameroon. <https://extranet.who.int/sree/Reports>. (accessed 26  
54 Jun 2011).  
55  
56  
57  
58  
59  
60

- 1  
2  
3 2. Aït-Khaled N, Alarcón E, Armengol R, et al. Prise en charge de la tuberculose. Guide des  
4 éléments essentiels pour une bonne pratique. (Sixième édition). Paris: Union Internationale  
5 Contre la Tuberculose et les Maladies Respiratoires 2010:P64.  
6  
7
- 8 3. Programme National de Lutte contre la Tuberculose. Guide Technique pour le personnel de  
9 santé(2<sup>ème</sup> édition révisée). Yaoundé : Ministère de la Santé Publique du Cameroun 2004:P40.  
10  
11
- 12 4. Maartens G, Wilkinson RJ. Tuberculosis. *Lancet* 2007;**370**:2030–43.  
13
- 14 5. Organisation Mondiale de la Santé. Le traitement de la tuberculose: Principes à l'intention  
15 des programmes nationaux (Troisième édition) Genève : OMS 2003:14-7.6.  
16  
17
- 18 6. Kuaban C, Bame R, Mouangue L, et al. Non conversion of sputum smear positive in new  
19 smear positive pulmonary tuberculous patients in Yaounde, Cameroon. *East Afr Med J*  
20 2009;**86**:219-25.  
21  
22
- 23 7. Castelnuovo B. A review of compliance to anti tuberculosis treatment and risk factors for  
24 defaulting treatment in Sub Saharan Africa. *Afr Health Sci* 2010;**10**:320-4.  
25  
26
- 27 8. Elbireer S, Guwatudde D, Mudiope P, et al. Tuberculosis treatment default among HIV-TB  
28 co-infected patients in urban Uganda. *Trop Med Int Health* 2011;**18**:doi: 10.1111/j.1365-  
29 3156.2011.02800.x.  
30  
31
- 32 9. Kandel TR, Mfenyana K, Chandia J, et al. The prevalence of and reasons for interruption of  
33 anti-tuberculosis treatment by patients at Mbekweni Health Centre in the King Sabata  
34 Dalindyebo (KSD) District in the Eastern Cape province. *SA Fam Pract* 2008;**50**:47.  
35  
36
- 37 10. Zellweger JP, Coulon P. Outcome of patients treated for tuberculosis in Vaud County,  
38 Switzerland. *Int J Tuberc Lung Dis* 1998;**2**:372-7.  
39  
40
- 41 11. Shargie EB, and Lindtjorn, B. Determinants of treatment adherence among smear-positive  
42 tuberculosis patients in Southern Ethiopia. *PLOS medicine* 2007;**4**:280-7.  
43  
44
- 45 12. Kaona ADF, Tuba M, Siziya S, et al. An assessment of factors contributing to treatment  
46 adherence and knowledge of TB transmission among patients on TB treatment. *BMC Public*  
47 *Health* 2004;**4**:68.  
48  
49
- 50 13. Tekle B, Mariam DH, and Ali A. Defaulting from DOTS and its determinants in three  
51 districts of Arsi Zone in Ethiopia. *Int J Tuberc Lung Dis* 2002;**6**:573-9.  
52  
53  
54  
55  
56  
57  
58  
59  
60

- 1  
2  
3 14. Kuaban C, Mbuntum F. Treatment outcome and risk factors for default in adult with  
4 pulmonary tuberculosis in Yaounde, Cameroon. *Health Science & Disease* 2002;1:5-9.  
5  
6  
7 15. Resolution WHA44.8. Tuberculosis control programme. In: *Handbook of resolutions and*  
8 *decisions of the World Health Assembly and the Executive Board*. Geneva: World Health  
9 Organization 1993 (WHA44/1991/REC/1):116.  
10  
11  
12 16. International Union Against Tuberculosis and Lung Disease. Best Practice for the Care of  
13 Patients with Tuberculosis. Paris: USAID 2007:P51.  
14  
15  
16 17. Kruk ME, Schwalbe NR, Aguiar CA. Timing of default from tuberculosis treatment: a  
17 systematic review. *Trop Med Int Health* 2008;13:703-12.  
18  
19  
20 18. Caylà JA, Rodrigo T, Ruiz-Manzano J, et al. Working Group on Completion of  
21 Tuberculosis Treatment in Spain (Study ECUTTE). Tuberculosis treatment adherence and  
22 fatality in Spain. *Respir Res* 2009;10:121.  
23  
24  
25 19. UNAIDS. "HIV and AIDS-related stigmatisation, discrimination and denial: forms,  
26 contexts and determinants," research studies from Uganda and India (prepared for UNAIDS  
27 by Peter Aggleton). Geneva:UNAIDS 2000:1-28.  
28  
29  
30 20. USAID. Breaking the cycle: Stigma, Discrimination, Internal stigma, and HIV. POLICY  
31 project (prepared for USAID by Ken Morrison) . Washington, DC: USAID2006:1-17.  
32  
33  
34 21. Bam TS, Gunneberg C, Chamroonsawasdi K, et al. Factors affecting patient adherence to  
35 DOTS in urban Kathmandu, Nepal. *Int J Tuberc Lung Dis* 2006;10:270-6.  
36  
37  
38 22. Chang KC, Leung CC, Tam CM. Risk factors for defaulting from antituberculosis  
39 treatment under directly observed treatment in Hong Kong. *Int J Tuberc Lung Dis* 2004;8:  
40 1492-98.  
41  
42  
43 23. Gelmanova IY, Keshavjee S, Golubchikova VT, et al. Barriers to successful tuberculosis  
44 treatment in Tomsk, Russian Federation: non-adherence, default and the acquisition of  
45 multidrug resistance. *Bull World Health Organ* 2007;85:703-11.  
46  
47  
48  
49  
50 24. Castelnuovo B, Hermans S, Park R, et al. Evaluation of the impact of TB-HIV integrated  
51 care in reducing the proportion of patients defaulting anti TB treatment in a large urban HIV  
52 clinic in Kampala, Uganda. [abstract IAS 2011].  
53  
54  
55  
56  
57  
58  
59  
60

1  
2  
3 25. Dalal RP, Macphail C, Mqhayi M, et al. Characteristics and outcomes of adult patients  
4 lost to follow-up at an antiretroviral treatment clinic in johannesburg, South Africa. *J Acquir*  
5 *Immune Defic Syndr* 2008;**47**:101-7.  
6  
7

8  
9  
10 26. Brinkhof MW, Pujades-Rodriguez M, Egger M. Mortality of patients lost to follow-up in  
11 antiretroviral treatment programmes in resource-limited settings: systematic review and meta-  
12 analysis. *PLoS One* 2009;**4**:e5790.  
13  
14

15  
16  
17  
18  
19  
20  
21  
22  
23  
24  
25  
26  
27  
28  
29  
30  
31  
32  
33  
34  
35  
36  
37  
38  
39  
40  
41  
42  
43  
44  
45  
46  
47  
48  
49  
50  
51  
52  
53  
54  
55  
56  
57  
58  
59  
60

For peer review only

**STROBE 2007 (v4) checklist of items to be included in reports of observational studies in epidemiology\***  
**Checklist for cohort, case-control, and cross-sectional studies (combined)**

| Section/Topic             | Item # | Recommendation                                                                                                                                                                                                                                                                                                                                                                                                                                                         | Reported on page # |
|---------------------------|--------|------------------------------------------------------------------------------------------------------------------------------------------------------------------------------------------------------------------------------------------------------------------------------------------------------------------------------------------------------------------------------------------------------------------------------------------------------------------------|--------------------|
| Title and abstract        | 1      | (a) Indicate the study's design with a commonly used term in the title or the abstract                                                                                                                                                                                                                                                                                                                                                                                 | 1                  |
|                           |        | (b) Provide in the abstract an informative and balanced summary of what was done and what was found                                                                                                                                                                                                                                                                                                                                                                    | 2                  |
| <b>Introduction</b>       |        |                                                                                                                                                                                                                                                                                                                                                                                                                                                                        |                    |
| Background/rationale      | 2      | Explain the scientific background and rationale for the investigation being reported                                                                                                                                                                                                                                                                                                                                                                                   | 4                  |
| Objectives                | 3      | State specific objectives, including any pre-specified hypotheses                                                                                                                                                                                                                                                                                                                                                                                                      | 4                  |
| <b>Methods</b>            |        |                                                                                                                                                                                                                                                                                                                                                                                                                                                                        |                    |
| Study design              | 4      | Present key elements of study design early in the paper                                                                                                                                                                                                                                                                                                                                                                                                                | 4,5                |
| Setting                   | 5      | Describe the setting, locations, and relevant dates, including periods of recruitment, exposure, follow-up, and data collection                                                                                                                                                                                                                                                                                                                                        | 4-6                |
| Participants              | 6      | (a) <i>Cohort study</i> —Give the eligibility criteria, and the sources and methods of selection of participants. Describe methods of follow-up<br><i>Case-control study</i> —Give the eligibility criteria, and the sources and methods of case ascertainment and control selection. Give the rationale for the choice of cases and controls<br><i>Cross-sectional study</i> —Give the eligibility criteria, and the sources and methods of selection of participants | 6,7                |
|                           |        | (b) <i>Cohort study</i> —For matched studies, give matching criteria and number of exposed and unexposed<br><i>Case-control study</i> —For matched studies, give matching criteria and the number of controls per case                                                                                                                                                                                                                                                 | /                  |
| Variables                 | 7      | Clearly define all outcomes, exposures, predictors, potential confounders, and effect modifiers. Give diagnostic criteria, if applicable                                                                                                                                                                                                                                                                                                                               | 6                  |
| Data sources/ measurement | 8*     | For each variable of interest, give sources of data and details of methods of assessment (measurement). Describe comparability of assessment methods if there is more than one group                                                                                                                                                                                                                                                                                   | 7                  |
| Bias                      | 9      | Describe any efforts to address potential sources of bias                                                                                                                                                                                                                                                                                                                                                                                                              | 5,7                |
| Study size                | 10     | Explain how the study size was arrived at                                                                                                                                                                                                                                                                                                                                                                                                                              | 5,7                |
| Quantitative variables    | 11     | Explain how quantitative variables were handled in the analyses. If applicable, describe which groupings were chosen and why                                                                                                                                                                                                                                                                                                                                           | 7                  |
| Statistical methods       | 12     | (a) Describe all statistical methods, including those used to control for confounding                                                                                                                                                                                                                                                                                                                                                                                  | 7,8                |
|                           |        | (b) Describe any methods used to examine subgroups and interactions                                                                                                                                                                                                                                                                                                                                                                                                    | 7,8                |
|                           |        | (c) Explain how missing data were addressed                                                                                                                                                                                                                                                                                                                                                                                                                            | 7,8                |
|                           |        | (d) <i>Cohort study</i> —If applicable, explain how loss to follow-up was addressed<br><i>Case-control study</i> —If applicable, explain how matching of cases and controls was addressed                                                                                                                                                                                                                                                                              | /                  |

|                          |     |                                                                                                                                                                                                              |             |
|--------------------------|-----|--------------------------------------------------------------------------------------------------------------------------------------------------------------------------------------------------------------|-------------|
|                          |     | <i>Cross-sectional study</i> —If applicable, describe analytical methods taking account of sampling strategy                                                                                                 |             |
|                          |     | (e) Describe any sensitivity analyses                                                                                                                                                                        |             |
| <b>Results</b>           |     |                                                                                                                                                                                                              |             |
| Participants             | 13* | (a) Report numbers of individuals at each stage of study—eg numbers potentially eligible, examined for eligibility, confirmed eligible, included in the study, completing follow-up, and analysed            | 8           |
|                          |     | (b) Give reasons for non-participation at each stage                                                                                                                                                         | 8           |
|                          |     | (c) Consider use of a flow diagram                                                                                                                                                                           | /           |
| Descriptive data         | 14* | (a) Give characteristics of study participants (eg demographic, clinical, social) and information on exposures and potential confounders                                                                     | 8           |
|                          |     | (b) Indicate number of participants with missing data for each variable of interest                                                                                                                          | 9           |
|                          |     | (c) <i>Cohort study</i> —Summarise follow-up time (eg, average and total amount)                                                                                                                             | 9           |
| Outcome data             | 15* | <i>Cohort study</i> —Report numbers of outcome events or summary measures over time                                                                                                                          | 9           |
|                          |     | <i>Case-control study</i> —Report numbers in each exposure category, or summary measures of exposure                                                                                                         |             |
|                          |     | <i>Cross-sectional study</i> —Report numbers of outcome events or summary measures                                                                                                                           |             |
| Main results             | 16  | (a) Give unadjusted estimates and, if applicable, confounder-adjusted estimates and their precision (eg, 95% confidence interval). Make clear which confounders were adjusted for and why they were included | 9,10,11     |
|                          |     | (b) Report category boundaries when continuous variables were categorized                                                                                                                                    | 9           |
|                          |     | (c) If relevant, consider translating estimates of relative risk into absolute risk for a meaningful time period                                                                                             |             |
| Other analyses           | 17  | Report other analyses done—eg analyses of subgroups and interactions, and sensitivity analyses                                                                                                               | 10          |
| <b>Discussion</b>        |     |                                                                                                                                                                                                              |             |
| Key results              | 18  | Summarise key results with reference to study objectives                                                                                                                                                     | 11,12       |
| Limitations              | 19  | Discuss limitations of the study, taking into account sources of potential bias or imprecision. Discuss both direction and magnitude of any potential bias                                                   | 13          |
| Interpretation           | 20  | Give a cautious overall interpretation of results considering objectives, limitations, multiplicity of analyses, results from similar studies, and other relevant evidence                                   | 11,12,13,14 |
| Generalisability         | 21  | Discuss the generalisability (external validity) of the study results                                                                                                                                        | 13,14       |
| <b>Other information</b> |     |                                                                                                                                                                                                              |             |
| Funding                  | 22  | Give the source of funding and the role of the funders for the present study and, if applicable, for the original study on which the present article is based                                                | 14          |

\*Give information separately for cases and controls in case-control studies and, if applicable, for exposed and unexposed groups in cohort and cross-sectional studies.

**Note:** An Explanation and Elaboration article discusses each checklist item and gives methodological background and published examples of transparent reporting. The STROBE checklist is best used in conjunction with this article (freely available on the Web sites of PLoS Medicine at <http://www.plosmedicine.org/>, Annals of Internal Medicine at <http://www.annals.org/>, and Epidemiology at <http://www.epidem.com/>). Information on the STROBE Initiative is available at [www.strobe-statement.org](http://www.strobe-statement.org).

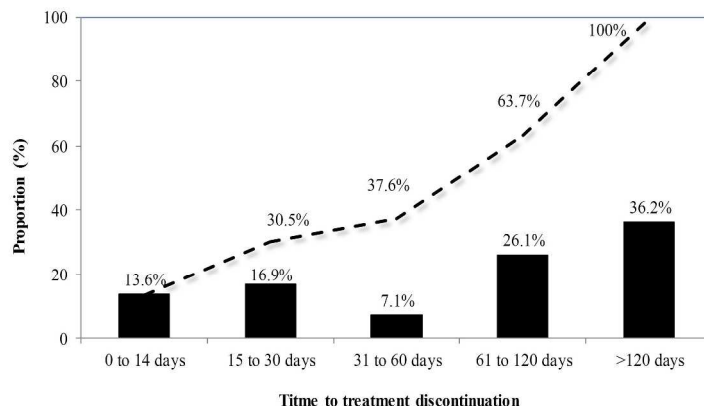

Figure 1 - Time to antituberculosis treatment discontinuation in 337 defaulters at the Yaounde Jamot Hospital in 2009

The vertical bars are proportional to the number of participants who stopped their treatment within the indicated time frame. The dotted superimposed curve is for the cumulative number of defaulter across time. Within each time frame, the frame specific proportion of defaulters is shown, together with the cumulative proportion of defaulters up to that time limit.

297x209mm (300 x 300 DPI)



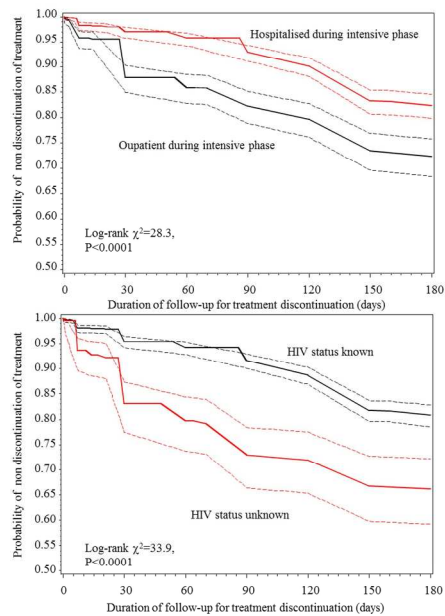

Figure 2 – Kaplan-Meier curves showing the probability of dropping out in subgroups defined by the setting of intensive treatment (upper panel) and knowledge of the status for HIV (lower panel) For each figure panel, the log-rank test results comparing the probability between subgroups are also shown.

297x209mm (300 x 300 DPI)
